1 **Multi-ancestry transcriptome-wide association studies of cognitive function, white matter**  
2 **hyperintensity, and Alzheimer’s disease**

3  
4  
5 **Chaar, Dima L.<sup>1</sup>, Li, Zheng<sup>2</sup>, Shang, Lulu<sup>3</sup>, Ratliff, Scott M.<sup>1</sup>, Mosley, Thomas H.<sup>1,4</sup>,**  
6 **Kardia, Sharon L.R.<sup>1</sup>, Zhao, Wei<sup>1,5</sup>, Zhou, X.<sup>2</sup>, Smith, J.A.<sup>1,5</sup>**

7  
8  
9 <sup>1</sup> Department of Epidemiology, School of Public Health, University of Michigan, Ann Arbor,  
10 Michigan, United States of America

11 <sup>2</sup> Department of Biostatistics, School of Public Health, University of Michigan, Ann Arbor,  
12 Michigan, United States of America

13 <sup>3</sup> Department of Biostatistics, University of Texas MD Anderson Cancer Center, Houston, Texas,  
14 United States of America

15 <sup>4</sup> Memory Impairment and Neurodegenerative Dementia (MIND) Center, University of  
16 Mississippi Medical Center, Jackson, Mississippi

17 <sup>5</sup> Survey Research Center, Institute for Social Research, University of Michigan, Ann Arbor,  
18 Michigan, United States of America

19  
20  
21  
22  
23  
24  
25  
26  
27  
28  
29  
30  
31  
32  
33  
34  
35  
36 \*Corresponding author:

37  
38 Jennifer A. Smith, PhD, MPH  
39 Department of Epidemiology  
40 University of Michigan  
41 1415 Washington Heights, #2631  
42 Ann Arbor, MI 48109-2029  
43 Phone: 734-615-9455  
44 Fax: 734-764-3192  
45 Email: smjenn@umich.edu  
46 ORCID: 0000-0002- 3575-5468  
47

48 **Author Summary**

49 Transcriptome-wide association studies (TWAS) can be used to understand the mechanisms of  
50 gene expression that underly disease etiology. However, to date, TWAS methods have mostly  
51 been used in a single ancestry group, especially European ancestry (EA), and few TWAS have  
52 focused on cognitive function or structural brain measures. We used a newly developed TWAS  
53 method called the Multi-ancEstry TRanscriptOme-wide analysis (METRO) to incorproate gene  
54 expression data from 801 EA and 1,032 African ancestry (AA) adults to identify genes  
55 associated with general cognitive function, structural brain changes called white matter  
56 hyperintensities (WMH) that predispose people to vascular dementia, and another form of  
57 dementia called Alzheimer’s disease (AD). We found that reduced gene expression of *ICAIL*  
58 was associated with more WMH and with AD, indicating its potential contribution to  
59 overlapping AD and vascular dementia neuropathologies. To our knowledge, our study is the  
60 first TWAS of cognitive function and neurocognitive disorders using multiple ancestries. This  
61 work may expand the benefits of TWAS studies beyond a single ancestry group and help to  
62 identify gene targets for pharmaceutical or preventative treatment for dementia.

63  
64

65  
66  
67  
68  
69  
70  
71  
72  
73  
74  
75  
76  
77  
78  
79  
80  
81  
82  
83  
84  
85  
86  
87  
88  
89

**Abstract**

Genetic variants increase the risk of neurocognitive disorders in later life including Vascular Dementia (VaD) and Alzheimer’s disease (AD), but the precise relationships between genetic risk factors and underlying disease etiology are not well understood. Transcriptome-wide association studies (TWAS) can be leveraged to better characterize the genes and biological pathways underlying genetic influences on disease. To date, almost all existing TWAS have been conducted using expression studies from individuals of a single genetic ancestry, primarily European. Using the joint likelihood-based inference framework in Multi-ancEstry TRanscriptOme-wide analysis (METRO), we leveraged gene expression data from European (EA) and African ancestries (AA) to identify genes associated with general cognitive function, white matter hyperintensity (WMH), and AD. Regions were fine-mapped using Fine-mapping Of CaUsal gene Sets (FOCUS). We identified 266, 23, 69, and 2 genes associated with general cognitive function, WMH, AD (using EA GWAS summary statistics), and AD (using AA GWAS), respectively (Bonferroni-corrected  $\alpha = P < 2.9 \times 10^{-6}$ ), some of which were previously identified. Enrichment analysis showed that many of the identified genes were in pathways related to innate immunity, vascular dysfunction, and neuroinflammation. Further, downregulation of *ICAIL* was associated with higher WMH and with AD, indicating its potential contribution to overlapping AD and VaD neuropathology. To our knowledge, our study is the first TWAS of cognitive function and neurocognitive disorders that used expression mapping studies in multiple ancestries. This work may expand the benefits of TWAS studies beyond a single ancestry group and help to identify gene targets for pharmaceutical or preventative treatment for dementia.



## 91 **Introduction**

92

93           Adult-onset dementia is comprised of a group of aging-related neurocognitive disorders  
94 caused by the gradual degeneration of neurons and the loss of brain function. These changes lead  
95 to a decline in cognitive abilities and impairment of daily activities and independent function. In  
96 the United States, Alzheimer’s disease (AD), the most common cause of dementia, affects 6.8  
97 million adults age 65 and older (1). The second most common form of dementia is vascular  
98 dementia (VaD), which often co-occurs with AD and is underdiagnosed (1,2). VaD is often  
99 difficult to distinguish from AD because these diseases share cognitive symptoms including  
100 noticeable impairment in episodic and semantic memory. While AD and VaD often co-occur,  
101 each form of dementia has differing pathophysiology that may precede the illness decades prior.

102           AD is characterized by aggregation of amyloid-beta protein and neurofibrillary tangles in  
103 brain tissue (3,4), while VaD may be caused by reduced blood flow to the brain as a result of  
104 small vessel disease (SVD) or stroke and is commonly seen in people with hypertension (5). AD  
105 is diagnosed based on a battery of memory tests, brain-imaging tests for degeneration of brain  
106 cells and laboratory tests to assess the presence of amyloid and tau proteins in cerebrospinal fluid  
107 (6). SVD is primarily detected on magnetic resonance imaging (MRI) as white matter  
108 hyperintensities (WMH). It has been hypothesized that vascular and neurodegenerative changes  
109 in the brain may interact in ways that increase the likelihood of cognitive impairment. A further  
110 challenge in the field is distinguishing between individuals who are aging normally from those  
111 with dementia pathology.

112           A greater understanding of the pathological processes that influence cognitive function in  
113 older adults is critical for early intervention during the long preclinical or prodromal phase prior  
114 to dementia onset, especially in vulnerable populations (7,8). For example, individuals of African

115 ancestry (AA) have a greater burden of and risk for developing dementia compared to Non-  
116 Hispanic Whites (9–12). Differences in gene expression, which are influenced by both genetic  
117 and non-genetic factors, likely play a role in shaping racial/ethnic health disparities in  
118 neurological outcomes. However, the underlying molecular and environmental mechanisms that  
119 influence gene expression are not fully understood, especially in populations with non-European  
120 ancestries. Given the multifactorial and complex nature of dementia, multi-omic data integration  
121 across ancestry groups may lend insight into these disparities, allowing the identification of  
122 targets for intervention and treatment in populations that are most at risk (13).

123         Genome-wide association studies (GWAS) have identified genetic variants associated  
124 with cognitive function and dementia; however, most GWAS variants are located in non-coding  
125 regions so their functional consequences are difficult to characterize (14). Transcriptome-wide  
126 association studies (TWAS) utilize gene expression and genetic data to increase power for  
127 identifying gene-trait associations and characterizing transcriptomic mechanisms underlying  
128 complex diseases. To date, however, few TWAS have been conducted on cognitive or structural  
129 brain measures. Further, previous TWAS have primarily been conducted in populations of  
130 European ancestry (EA), but these results cannot always be generalized to other genetic  
131 ancestries due to differences in allele frequencies, patterns of linkage disequilibrium (LD), and  
132 relationships between SNPs and gene expression between populations (15–18). To better identify  
133 gene-trait associations in non-EA ancestries, it is necessary to incorporate results from recent  
134 expression quantitative trait locus (eQTL) mapping studies, which identify genetic variants that  
135 explain variations in gene expression levels, conducted in different ancestry groups.(19)

136         Multi-ancestry TRanscriptOme-wide analysis (METRO)(20) is a TWAS method that  
137 uses a joint likelihood-based inference framework to borrow complementary information across

138 multiple ancestries to increase TWAS power. In this study, we used genotype and gene  
139 expression data from 1,032 AA and 801 EA from the Genetic Epidemiology Network of  
140 Arteriopathy (GENOA) and summary statistics from published GWAS (21–24) to identify genes  
141 associated with general cognitive function, white matter hyperintensity, and AD. We then  
142 examined the contribution of different ancestry-dependent transcriptomic profiles on the gene-  
143 trait associations. Greater knowledge of the underlying molecular mechanisms of dementia that  
144 are generalizable to both EA and AA is a critical step in evaluating potential causal variants and  
145 genes that could be targeted for pharmaceutical development.

146  
147

## 148 **2. Materials and Methods**

149

### 150 **2.1. Sample**

#### 151 *The Genetic Epidemiology Network of Arteriopathy (GENOA)*

152 The GENOA study is a community-based longitudinal study aimed at examining the  
153 genetic effects of hypertension and related target organ damage (25). EA and AA hypertensive  
154 sibships were recruited if at least 2 siblings were clinically diagnosed with hypertension before  
155 age 60. All other siblings were invited to participate, regardless of their hypertension status.  
156 Exclusion criteria included secondary hypertension, alcoholism or drug abuse, pregnancy,  
157 insulin-dependent diabetes mellitus, active malignancy, or serum creatinine levels  $>2.5\text{mg/dL}$ . In  
158 Phase I (1996-2001), 1,854 AA participants (Jackson, MS) and 1,583 EA participants  
159 (Rochester, MN) were recruited (25). In Phase II (2000-2004), 1,482 AA and 1,239 EA  
160 participants were successfully followed up, and their potential target organ damage from  
161 hypertension was measured. Demographics, medical history, clinical characteristics, information  
162 on medication use, and blood samples were collected in each phase. After data cleaning and

163 quality control, a total of 1,032 AA and 801 EA with genotype and gene expression data were  
164 available for analysis. Written informed consent was obtained from all participants, and approval  
165 was granted by participating institutional review boards (University of Michigan, University of  
166 Mississippi Medical Center, and Mayo Clinic).

167

## 168 **2.2. Measures**

### 169 **2.2.1. Genetic Data**

170 AA and EA blood samples were genotyped using the Affymetrix® Genome-Wide  
171 Human SNP Array 6.0 or the Illumina 1M Duo. We followed the procedures outlined by Shang  
172 et al.(18) for data processing. For each platform, samples and SNPs with a call rate <95%,  
173 samples with mismatched sex, and duplicate samples were excluded. After removing outliers  
174 identified from genetic principal component analysis, there were 1,599 AA and 1,464 EA with  
175 available genotype data. Imputation was performed using the Segmented HAPlotype Estimation  
176 & Imputation Tool (SHAPEIT) v.2.r(26) and IMPUTE v.2(27) using the 1000 Genomes project  
177 phase I integrated variant set release (v.3) in NCBI build 37 (hg19) coordinates (released in  
178 March 2012). Imputation for each genotyping platform was performed separately and then  
179 combined. The final set of genotype data included 30,022,375 and 26,079,446 genetic variants  
180 for AA and EA, respectively. After removing genetic variants with  $MAF \leq 0.01$ , imputation  
181 quality score (INFO score)  $\leq 0.4$  in any platform-based imputation, and indels, a total of  
182 13,793,193 SNPs in AA and 7,727,215 SNPs in EA were available for analysis. We used the  
183 GENESIS package(28) in R to infer population structure in the analytic sample, and the PC-AiR  
184 function was used to extract the first five genotype PCs which were subsequently used to adjust  
185 for population structure.



## 186 2.2.2. Gene Expression Data

187 Gene expression levels were measured from Epstein-Barr virus (EBV) transformed B-  
188 lymphoblastoid cell lines (LCLs) created from blood samples from a subset of GENOA AA  
189 (n=1,233) and EA (n=919). Gene expression levels of AA samples were measured using the  
190 Affymetrix Human Transcriptome Array 2.0, while gene expression levels of EA samples were  
191 measured using Affymetrix Human Exon 1.0 ST Array. We followed the procedures outlined by  
192 Shang et al.(18) In particular, the Affymetrix Expression Console was used for quality control  
193 and all array images passed visual inspection. In AA, 28 samples were removed due to either low  
194 signal-to-noise ratio (n=1), abnormal polyadenylated RNA spike-in controls (Lys < Phe < Thr <  
195 Dap; n=24), sample mislabeling (n=2), or low RNA integrity (n=1), resulting in a total of  
196 n=1,205 AA samples for analysis. In EA, duplicated samples (n=31), control samples (n=11) and  
197 sex mismatch samples (n=2) were removed, resulting in n=875 EA samples for analysis. We  
198 processed data in each population separately. Raw intensity data were processed using the  
199 Affymetrix Power Tool software (29). AffymetrixCEL files were normalized using the Robust  
200 Multichip Average (RMA) algorithm which included background correction, quantile  
201 normalization, log<sub>2</sub>-transformation, and probe set summarization.(30) The algorithm also  
202 includes GC correction (GCCN), signal space transformation (SST), and gain lock (value=0.75)  
203 to maintain linearity. The Brainarray custom CDF(31) v.19 was used to map the probes to genes.  
204 This custom CDF uses updated genomic annotations and multiple filtering steps to ensure that  
205 the probes used are specific for the intended gene cluster. Specifically, it removes probes with  
206 non-unique matching cDNA/EST sequences that can be assigned to more than one gene cluster.  
207 As a result, gene expression data processed using custom CDF are expected to be largely free of  
208 mappability issues. After mapping, ComBat(32) was used to remove batch effects. For each

209 gene, we applied a linear regression model to adjust for age, sex, and first five genotype principal  
210 components (PCs). We then extracted the residuals and quantile normalized residuals across all  
211 samples. We analyzed a common set of 17,238 protein coding genes that were annotated in  
212 GENCODE (release 12) (33).

213

### 214 **2.2.3. GWAS summary statistics**

215 We used summary statistics from GWAS for general cognitive function (21), WMH (22),  
216 AD in EA(23), and AD in AA(24) as input for METRO. Three of the GWASs, Davies et al.  
217 (2018), Sargurupremraj et al. (2020), and Bellenguez et al. (2022), were selected because they  
218 are the largest meta-analyses to date with publicly available summary statistics; however, we  
219 note that all three were conducted in primarily EA samples. We also selected the Kunkle et al.  
220 (2021) GWAS because it is the largest meta-analysis to date with public available summary  
221 statistics in primarily AA samples. Below, we describe each GWAS and also provide  
222 information about the corresponding TWAS analyses that were reported in two of the input  
223 GWAS (WMH(22) and AD in EA(23)) which use the same GWAS summary statistics as our  
224 analysis but different gene expression data.

225

### 226 **General cognitive function**

227 We obtained GWAS summary statistics for general cognitive function from a meta-  
228 analysis by Davies et al. (2018) that includes the Cohorts for Heart and Aging Research in  
229 Genomic Epidemiology (CHARGE), the Cognitive Genomics Consortium (COGENT) consortia  
230 and the UK Biobank (UKB; Table 1) (21). This study included 300,486 EA individuals with ages  
231 between 16 and 102 years from 57 population-based cohorts. This is the largest available GWAS

232 for general cognitive function, and there are currently no large-scale GWAS studies available in  
233 non-EA. General cognitive function was constructed from a number of cognitive tasks. Each  
234 cohort was required to have tasks that tested at least three different cognitive domains. Principal  
235 component (PC) analysis was performed on the cognitive tests scores within each cohort, and the  
236 first unrotated component was extracted as the measure of general cognitive function. Models  
237 performed within each cohort were adjusted for age, sex, and population stratification. Exclusion  
238 criteria included clinical stroke (including self-reported stroke) or prevalent dementia.

239

#### 240 **White matter hyperintensity**

241 We obtained the GWAS summary statistics for WMH from a meta-analysis conducted by  
242 Sargurupremraj et al. (2020) that included 48,454 EA and 2,516 AA with mean age of 66.0  
243 (SD=7.5) years from 23 population-based studies from the CHARGE consortium and UKB  
244 (Table 1) (22). We obtained publicly available GWAS summary statistics from only EA  
245 individuals. Summary statistics for only EA are publicly available for this GWAS. WMH was  
246 measured from MRI scans obtained from scanners with field strengths ranging from 1.5 to 3.0  
247 Tesla and interpreted using a standardized protocol blinded to clinical or demographic features.  
248 In addition to T1 and T2 weighted scans, some cohorts included fluid-attenuated inversion  
249 recovery (FLAIR) and/or proton density (PD) sequences to measure WMH from cerebrospinal  
250 fluid. WMH volume measures were inverse normal transformed, and models adjusted for sex,  
251 age, genetic PCs and intracranial volume (ICV). Exclusion criteria included history of stroke or  
252 other pathologies that influence measurement of WMH at the time of MRI.

253 To functionally characterize and prioritize individual WMH genomic risk loci,  
254 Sargurupremraj et al.(22) (2020) conducted TWAS using TWAS-Fusion(34) with summary

255 statistics from the WMH SNP-main effects (EA only) analysis and weights from gene expression  
256 reference panels from blood (Netherlands Twin Registry; Young Finns Study), arterial  
257 (Genotype-Tissue Expression, GTEx), brain (GTEx, CommonMind Consortium) and peripheral  
258 nerve tissue (GTEx). This study did not perform fine-mapping following TWAS analysis.

259

## 260 **Alzheimer's disease (GWAS in EA)**

261 We obtained the EA GWAS summary statistics for Alzheimer's disease from stage I  
262 meta-analysis by Bellenguez et al. (2022) that included EA from the European Alzheimer and  
263 Dementia Biobank (EADB), GR@ACE, EADI, GERAD/PERADES, DemGene, Bonn, the  
264 Rotterdam study, CCHS study, NxC and the UKB (Table 1) (23). The meta-analysis was  
265 performed on 39,106 clinically diagnosed AD cases, 46,828 proxy-AD and related dementia  
266 (ADD) cases, and 401,577 controls. AD cases were clinically diagnosed in all cohorts except  
267 UKB, where individuals were identified as proxy-ADD cases if their parents had dementia.  
268 Participants without the clinical diagnosis of AD, or those without any family history of  
269 dementia, were used as controls. Models performed within each cohort were adjusted for PCs  
270 and genotyping centers, when necessary.

271 To examine the downstream effects of new AD-associated variants on molecular  
272 phenotypes in various AD-relevant tissues, Bellenguez et al. (2022) conducted a TWAS with  
273 stage I AD GWAS results. The TWAS was performed by training functional expression and  
274 splicing reference panels based on the Accelerating Medicines Partnership (AMP)-AD bulk brain  
275 and EADB lymphoblastoid cell lines (LCL) cohorts, while leveraging pre-calculated reference  
276 panel weights(35) for the GTEx dataset(36) in tissues and cells of interest. TWAS associations  
277 were then fine-mapped using Fine-mapping Of CaUsal gene Sets (FOCUS) (37).

278

## 279 **Alzheimer's disease (GWAS in AA)**

280 We also acquired the AA GWAS summary statistics for Alzheimer's disease from meta-  
281 analysis by Kunkle et al. (2021)(24) that included individuals of African American ancestry from  
282 15 cohort studies from the AD Genetics Consortium (ADGC; Table 1). The meta-analysis was  
283 performed on 2,748 clinically diagnosed AD cases and 5,222 controls with a mean age of 74.2  
284 years (SD=13.6). Models performed within each cohort were adjusted for age, sex, and PCs for  
285 population substructure.

286

## 287 **2.3 Statistical Methods**

### 288 **2.3.1. Multi-ancestry transcriptome-wide association study**

289 Using the Multi-ancEstry TRanscriptOme-wide analysis (METRO) (20), we conducted a  
290 high-powered TWAS with calibrated type I error control to identify the key gene-trait  
291 associations and transcriptomic mechanisms underlying general cognitive function, WMH and  
292 AD. Since gene expression prediction models constructed in different ancestries may contain  
293 complementary information, even when the input GWAS was conducted in a single ancestry  
294 (20), we used METRO to model gene expression from EA and AA simultaneously. METRO  
295 uses a joint-likelihood framework that accounts for SNP effect size heterogeneity and LD  
296 differences across ancestries. The framework selectively upweights information from the  
297 ancestry that has greater certainty in the gene expression prediction model, increasing power and  
298 allowing characterization of the relative contribution of each ancestry to the TWAS results.

299 METRO is described in Li et al.(20) Briefly, each gene is examined separately using gene  
300 expression data from  $M$  different genetic ancestries.  $\mathbf{Z}_m$  is the  $n_m$ -vector of gene expression

301 measurements on  $n_m$  individuals in the  $m^{\text{th}}$  ancestry with  $m \in \{1, \dots, M\}$ . For the gene of interest,  
302 all *cis*-SNPs ( $p$ ), which are in potential linkage disequilibrium (LD) with each other, were  
303 extracted as predictors for gene expression.  $\mathbf{G}_m$  is denoted as the  $n_m \times p$  genotype matrix for these  
304 *cis*-SNPs. Besides the gene expression data, we also used GWAS summary statistics from  $n$   
305 individuals for an outcome trait of interest.  $\boldsymbol{\gamma}$  is the  $n$ -vector of outcome measurements in the  
306 GWAS data and  $\mathbf{G}$  is the corresponding  $n \times p$  genotype matrix on the same set of  $p$  *cis*-SNPs.  
307 The expression vector  $\mathbf{z}_m$ , the outcome vector  $\boldsymbol{\gamma}$  and each column of the genotype matrixes are  
308 centered and standardized.  $\mathbf{G}_m$  and  $\mathbf{G}$  have a mean of zero and variance of one. For each TWAS,  
309 we used GWAS summary statistics in the form of marginal z-scores and a SNP-SNP correlation  
310 (LD) matrix estimated with genotype data from our GENOA sample that correspond with the  
311 ancestry of the GWAS (EA or AA). The following equations describe the relationships between  
312 the SNPs, gene expression and the outcome:

$$\mathbf{z}_m = \mathbf{G}_m \boldsymbol{\beta}_m + \boldsymbol{\epsilon}_m, \quad (\text{Equation 1})$$

313  $\boldsymbol{\gamma} = \alpha(\mathbf{G}\boldsymbol{\beta}) + \boldsymbol{\epsilon}_\gamma, \quad (\text{Equation 2})$

314 Equation (1) describes the relationship between gene expression and the *cis*-SNP  
315 genotypes in the gene expression study in GENOA for the  $m^{\text{th}}$  ancestry (EA or AA).  $\boldsymbol{\beta}_m$  is a  $p$   
316 vector of the *cis*-SNP effects on the gene expression in the  $m^{\text{th}}$  ancestry and  $\boldsymbol{\epsilon}_m$  is an  $n_m$ -vector of  
317 residual errors with each element following an independent and normal distribution  $N(0, \sigma_m^2)$   
318 with an ancestry specific variance  $\sigma_m^2$ . Equation (2) describes the relationship between the  
319 genetically regulated gene expression (GReX), calculated from estimated SNP prediction  
320 weights, and the outcome trait (general cognitive function, WMH or AD) from the GWAS.  
321 There,  $\mathbf{G}\boldsymbol{\beta}$  denotes an  $n$ -vector of GReX constructed for the GWAS individuals, where  $\boldsymbol{\beta} = \Sigma_m$

322  $w_m\beta_m$  is a  $p$ -vector of SNP effects on the gene expression in the GWAS data, where the weights  
323  $\sum_{m=1}^M w_m=1$  and  $w_m\geq 0$ . The alpha value ( $\alpha$ ) is the effect of GReX constructed for the GWAS  
324 individuals on the outcome trait, and  $\varepsilon_y$  is an  $n_m$ -vector of residual errors with each element  
325 following an independent and normal distribution  $N(0, \sigma_m^2)$ . Both equations, specified based on  
326 separate studies, are connected through the predictive SNP effects on the gene expression ( $\beta_m$   
327 and  $\beta$ ). A key assumption made is that the SNP effects on the gene expression in the GWAS,  $\beta$ ,  
328 can be expressed as a weighted summation of the SNP effects on gene expression in the  
329 expression studies conducted across ancestries.

330 We derived the overall GReX effect  $\alpha$  and the contribution weight of each ancestry ( $w_1$   
331 for AA and  $w_2$  for EA) to infer the extent and contribution of the two genetic ancestries in  
332 informing the GReX-trait association. The joint model defined in Equations 1 and 2 allows us to  
333 borrow association strength across multiple ancestries to enable powerful inference of GReX-  
334 trait associations for general cognitive function, WMH and AD. We declared the gene to be  
335 significant if the p-value was below the corresponding Bonferroni corrected threshold for the  
336 number of tested genes ( $P<0.05/17,238 = 2.90\times 10^{-6}$ ). Manhattan plots and quantile-quantile (QQ)  
337 plots were generated using the *qqman*(38) R package.

338

### 339 **2.3.2 Fine-mapping analysis**

340 Since genes residing in the same genomic region may share eQTLs or contain eQTL  
341 SNPs in LD with each other, TWAS test statistics for genes in the same region can be highly  
342 correlated, making it difficult to identify the true biologically relevant genes among them. To  
343 prioritize the putatively causal genes identified by METRO for general cognitive function,  
344 WMH, and AD, we conducted TWAS fine-mapping using FOCUS (Fine-mapping Of CaUsal

345 gene Sets) (37). To identify a genomic region with at least one significant gene detected by  
346 METRO, we obtained a set of independent, non-overlapping genomic regions, or LD blocks,  
347 using Ldetect (39). In each analyzed genomic block, using a standard Bayesian approach, we  
348 assigned a posterior inclusion probability (PIP) for each gene to be causal, given the observed  
349 TWAS statistics. We used gene-level Z scores, created from p-values using the inverse  
350 cumulative distribution function (CDF) of a standard normal distribution, as input into FOCUS.  
351 We then ranked the PIPs and computed the 90%-credible set that contains the causal gene with  
352 90% probability. In the FOCUS analysis, a null model which assumes none of the genes in the  
353 region are causally associated with the trait is also considered as a possible outcome and may be  
354 included in the credible set. Through fine-mapping, we narrowed down significantly associated  
355 genes identified by METRO to a shorter list of putatively true associations.

356

### 357 **2.3.3 Characterization of identified genes**

358 To interpret our TWAS findings, both before and after fine-mapping, we further  
359 examined whether the genes identified by METRO overlapped with those previously identified  
360 by their corresponding input GWAS. We created a set of Venn diagrams of overlapping genes  
361 identified using METRO with those from the SNP-based GWAS association results(21–24)  
362 mapped to the nearest gene using the *VennDiagram* R package (40). We then constructed a  
363 second set of Venn diagrams showing overlapping genes identified using METRO with genes  
364 identified by gene-based association analyses in each of the input GWAS studies. The gene-  
365 based analyses were conducted using MAGMA(41) (general cognitive function,(21) WMH(22),  
366 and AD (AA GWAS)(24)) or gene prioritization tests (AD (EA GWAS)(23)). Finally, we  
367 created a set of Venn diagrams comparing genes identified using METRO with those identified



368 in the TWAS that were conducted as part of the WMH(22) and AD (EA GWAS)(23) input  
369 GWAS studies. We used the *geneSynonym* R package(42) to ensure that genes named differently  
370 across studies were captured.

371

### 372 **2.3.4 Functional Enrichment Analysis**

373 To characterize the biological function of the identified genes by METRO for general  
374 cognitive function, WMH and AD, we performed gene set enrichment analysis. Specifically, we  
375 used the g:GOS(43) tool on the web software g:Profiler and mapped the genes to known  
376 functional informational sources, including Gene Ontology (GO): molecular function (MF), GO:  
377 biological process (BP), GO: cellular component (CC), Kyoto Encyclopedia of Genes and  
378 Genomes (KEGG), Reactome (REAC), WikiPathways (WP), Transfac (TF), MiRTarBase  
379 (MIRNA), Human Protein Atlas (HPA), CORUM protein complexes, and Human Phenotype  
380 Ontology (HP). In this analysis, we used the default option g:SCS method (Set Counts and Sizes)  
381 in g:Profiler for multiple testing correction and presented pathways identified with an adjusted p-  
382 value  $< 0.05$ . Driver terms in GO are highlighted using a two-stage algorithm for filtering GO  
383 enrichment results, providing a more efficient and reliable approach compared to traditional  
384 clustering methods. This feature groups significant terms into sub-ontologies based on their  
385 relations, and the second stage identifies leading gene sets that give rise to other significant  
386 functions in the same group of terms. This method uses a greedy search strategy that recalculates  
387 hypergeometric p-values and results in the consideration of multiple leading terms in a  
388 component, rather than selection of terms with the highest significance level.

389

## 390 **Results**

391 In Table 1, we provide descriptive statistics for the samples used in the eQTL mapping  
392 study (e.g., 1,032 AA and 801 EA from GENOA) and the four input GWAS.(21–23) The  
393 GENOA eQTL study included participants with a mean age of 56.9 (SD=10.0) years. More than  
394 half of participants were female (65.6%). Mean age of participants was 56.9 (SD=7.8) years in  
395 the general cognitive function GWAS(21), and 64.2 years in the WMH GWAS.(22) In the AD  
396 GWAS in EA (23), mean age was 73.6 (SD=8.1) years for cases and 67.9 (SD=8.6) years for  
397 controls. In the AD GWAS in AA (24), mean age was 74.2 (SD=13.6) years for all participants.

398 Using METRO, we identified 602 genes associated with general cognitive function, 45  
399 genes associated with WMH, 231 genes associated with AD (EA GWAS), and 9 genes  
400 associated with AD (AA GWAS) that were significant at the Bonferroni corrected alpha level  
401 ( $P < 2.90 \times 10^{-6}$ ; Figure 1, Tables S1-3). Genomic inflation factors for the TWAS p-values ranged  
402 from 1.00 to 2.55 (Figure 2). Among the three neurocognitive outcomes, prior to fine-mapping,  
403 METRO TWAS identified the *ICAIL* gene overlapping between WMH and AD (from EA  
404 GWAS); the *FMNLI* gene overlapping between WMH and general cognitive function; and 22  
405 genes enriched in AD-related pathways and functions overlapping between general cognitive  
406 function and AD (from EA GWAs) (Figure 3a; Figure S1). After fine-mapping, the only  
407 overlapping gene that remained was *ICAIL* between WMH and AD (Figure 3b). The METRO  
408 TWAS for AD (AA GWAS) identified 9 genes overlapping with those identified in AD (EA  
409 GWAS); however, following fine-mapping, only *TOMM40* overlapped between the two AD  
410 TWASs (Figure 3b).

411 For all identified genes, we also examined the contribution weights of expression  
412 prediction models for the EA and AA ancestries, prior to fine-mapping ( $P < 2.90 \times 10^{-6}$ ; Figure 4).  
413 For the WMH TWAS, we found that a large proportion of genes had stronger contributions from

414 EA weights than AA weights (65.2%). This is consistent with Li et al. (2022)(20) who found that  
415 the gene expression prediction models constructed in the same ancestry as the input GWAS, in  
416 this case EA, often have larger contribution weights than those constructed in other ancestries.  
417 However, for both general cognitive function and AD (EA and AA GWAS), the contributions  
418 from EA and AA weights were similar, which likely increased power to identify genes relevant  
419 to AA.

420 After fine-mapping, there were 266 genes in the 90%-credible set across 172 different  
421 genomic regions for general cognitive function. This gene set included 82 genes that were not  
422 previously identified in the SNP-based GWAS results (mapped to the nearest gene) or the gene-  
423 based analysis results from Davies et al. (2018)(21) (Figure 5, Table S1); however, it is likely  
424 that some of these genes are in broader genomic regions tagged by the GWAS-identified SNPs.  
425 Specifically, there were 126 and 168 overlapping genes between METRO and the SNP-based  
426 and gene-based associations from Davies et al. (2018)(21), respectively (Figure 5). The 266  
427 METRO-identified genes were enriched in regulatory pathways involved in protein binding ( $p_{\text{adj}}$   
428  $= 1.17 \times 10^{-5}$ ), developmental cell growth ( $p_{\text{adj}} = 3.33 \times 10^{-5}$ ), and protein metabolic process ( $p_{\text{adj}}$   
429  $= 7.18 \times 10^{-4}$ ), as well as neurodevelopmental processes such as neuron to neuron synapse ( $p_{\text{adj}} =$   
430  $1.22 \times 10^{-3}$ ) and neuron projection ( $p_{\text{adj}} = 7.14 \times 10^{-3}$ ; Figure 6). The 82 genes that were not  
431 previously identified in Davies et al. (2018)(21) were enriched for positive regulation of  
432 biological process ( $p_{\text{adj}} = 1.77 \times 10^{-2}$ ), proteasome activator complex ( $p_{\text{adj}} = 1.00 \times 10^{-2}$ ),  
433 nucleoplasm ( $p_{\text{adj}} = 1.29 \times 10^{-2}$ ) and chromatin ( $p_{\text{adj}} = 4.71 \times 10^{-5}$ ; Figure S2).

434 After fine-mapping, there were 23 genes in the 90%-credible set across 15 genomic  
435 regions for WMH, including 12 genes that were not previously identified in the SNP-based  
436 GWAS results mapped to the nearest gene or the gene-based analysis results from

437 Sargurupremraj et al. (2020)(22) (Figure 7, Table S2). Specifically, there were 7 and 12  
438 overlapping genes between METRO and the SNP-based and gene-based associations from  
439 Sargurupremraj et al. (2020)(22), respectively (Figure 7). The 23 METRO-identified genes were  
440 enriched for zinc finger motif ( $p_{\text{adj}} = 1.27 \times 10^{-2}$ ), miRNA has-212-5p ( $p_{\text{adj}} = 1.94 \times 10^{-2}$ ) and  
441 retinal inner plexiform layer ( $p_{\text{adj}} = 3.86 \times 10^{-2}$ ; Figure 8). The 12 genes associated with WMH  
442 that were previously not identified by Sargurupremraj et al. (2020)(22) were enriched for DNA  
443 binding domain Zinc Finger Protein 690 (ZNF690;  $p_{\text{adj}} = 2.52 \times 10^{-3}$ ) and ClpX protein  
444 degradation complex ( $p_{\text{adj}} = 4.97 \times 10^{-2}$ ; Figure S3).

445         After fine-mapping, there were 69 genes in the 90%-credible set across 56 genomic  
446 regions associated with AD (EA GWAS), including 45 genes that were not previously identified  
447 in the SNP-based GWAS results mapped to the nearest gene or the gene prioritization analysis  
448 results from Bellenguez et al. (2022)(23) (Figure 9, Table S3). Specifically, there were 16 and 14  
449 overlapping genes between METRO and the SNP-based and gene prioritization test results from  
450 Bellenguez et al. (2022)(23), respectively (Figure 9). The 69 METRO-identified genes were  
451 enriched for AD-associated processes including regulation of amyloid fibril formation ( $p_{\text{adj}} =$   
452  $1.87 \times 10^{-3}$ ), amyloid-beta clearance ( $p_{\text{adj}} = 1.90 \times 10^{-3}$ ), microglial cell activation ( $p_{\text{adj}} = 5.79 \times$   
453  $10^{-3}$ ), amyloid-beta metabolic process ( $p_{\text{adj}} = 1.07 \times 10^{-2}$ ), and neurofibrillary tangle ( $p_{\text{adj}} = 2.80 \times$   
454  $10^{-4}$ ; Figure 10). The 45 genes associated with AD that were previously not identified by  
455 Bellenguez et al. (2022)(23) were enriched for hematopoietic cell lineage ( $p_{\text{adj}} = 1.73 \times 10^{-3}$ ) and  
456 neurofibrillary tangle ( $p_{\text{adj}} = 9.13 \times 10^{-3}$ ; Figure S4).

457         We identified 2 genes, *APOE* and *PVRL2*, in the 90%-credible set associated with AD  
458 (AA GWAS) (Table S4). After fine-mapping, none of these genes overlapped with SNP-based  
459 GWAS results mapped to the nearest gene or the gene-based analysis results from Kunkle et al.

460 (2021), since they are both in the broader *APOE* region, which was the only identified gene in  
461 Kunkle et al (2021). The 2 METRO-identified genes were enriched for coreceptor-mediated  
462 virion attachment to host ( $p_{\text{adj}} = 4.96 \times 10^{-2}$ ; Figure 11).

463 We compared the genes identified by METRO before and after fine-mapping with those  
464 identified by TWAS studies in Sargurupremraj et al. (2020)(22) and Bellenguez et al. (2022)(23)  
465 which used TWAS-Fusion (Figure 12). For WMH, there were 16 and 10 genes identified both by  
466 METRO before and after fine-mapping and by the TWAS-Fusion analysis conducted by  
467 Sargurupremraj et al. (2020)(22), respectively (Table 2). For AD, there were 24 and 10 genes  
468 identified both by METRO before and after fine-mapping and by the TWAS-Fusion followed by  
469 FOCUS fine-mapping analysis conducted by Bellenguez et al. (2022)(23) (Table 3). *ICAIL* was  
470 the only gene overlapping between all four AD and WMH TWAS association results.

471

## 472 **Discussion**

473 While previous studies have identified genes associated with cognitive function, WMH,  
474 and AD, there are few TWAS that utilize genetic and gene expression data from multiple  
475 ancestries to elucidate gene-trait associations and molecular mechanisms underlying the  
476 etiologies of cognitive function and neurocognitive disorders. Using the METRO method in  
477 GWAS consisting primarily of EA followed by FOCUS fine-mapping, we identified 266, 23, and  
478 69 genes associated with general cognitive function, WMH, and AD, respectively, with 82, 12  
479 and 45 of them not previously identified in the original GWAS. In addition, using an AA  
480 GWAS, we identified 2 fine-mapped genes associated with AD, both of which are proximal to  
481 *APOE*. Studying the transcriptomic mechanisms underlying cognitive function, WMH and  
482 dementia using both EA and AA expression data may enhance our understanding of cognitive

483 health prior to and following the onset of dementia and further allow us to generalize findings  
484 from large scale EA GWAS to other ancestries.

485 AD and SVD have overlapping features that contribute to dementia neuropathology  
486 including breakdown of the blood-brain barrier(44) and the presence of small cortical and  
487 subcortical infarcts, microbleeds, perivascular spacing, and WMH in brain tissue(45). After fine-  
488 mapping, Islet Cell Autoantigen 1 Like (*ICA1L*) was identified in both the WMH and AD  
489 TWAS. This is as a highly plausible prioritized gene that is likely to modulate the metabolism of  
490 amyloid precursor protein (APP)(23) and increase risk of AD. *ICA1L* encodes a protein whose  
491 expression is activated by type IV collagen and plays a crucial role in myelination(46). Increased  
492 *ICA1L* expression is also associated with lower risk of AD(47–49) and small vessel strokes  
493 (SVS), the acute outcomes of cerebral SVD, which may lead to VaD(50). Consistent with these  
494 studies, our TWAS found that decreased expression of *ICA1L* is associated with increased risk of  
495 AD and WMH, a subclinical indicator of SVD. Single-cell RNA-sequencing has shown *ICA1L*  
496 expression to be enriched in cortical glutamatergic excitatory neurons, which are crucial  
497 components in neural development and neuropathology through their role in cell proliferation,  
498 differentiation, survival, neural network formation and cell death(51,52). *ICA1L* has been  
499 examined as a possible drug target for SVD, AD, and other neurodegenerative diseases(50,53);  
500 however, it is not recommended as a prioritized drug at this time due to potential side effects  
501 including increased risk of coronary artery disease and myocardial infarction as well as lower  
502 diastolic blood pressure(53). Nevertheless, *ICA1L* may contribute to overlapping AD and VaD  
503 neuropathology, and it could be a potential target for therapeutics and/or preventative treatments  
504 for AD and VaD in the future if adverse events can be reduced.

505 Our TWAS of AD (from EA GWAS) identified 45 genes that were not identified in the  
506 SNP-based GWAS results mapped to the nearest gene or the gene-based analysis reported in  
507 Bellenguez et al. (2022)(23). The 45 genes were enriched for hematopoietic cell lineage, which  
508 are progenitors of red and white blood cells including those related to immunity (e.g., natural  
509 killer cells, T- and B- lymphocytes and other types of leukocytes)(54–60). Our TWAS identified  
510 genes that have been previously associated with AD, including *APOE*, *TOMM40*, *APOC4*, *CLU*,  
511 *PICALM* and *CR2*, among others(23,61,62). While we identified *APOE*, the strongest genetic  
512 risk factor for AD in most populations, after fine-mapping, we did not identify *ABCA7* which  
513 confers an equal or even greater risk for AD in AA(63–65). This finding is perhaps not  
514 surprising considering that our TWAS was conducted using an EA GWAS, and the strength of  
515 association between *ABCA7* and AD is comparatively weaker in EA than in AA.(65) To identify  
516 genes associated with AD risk in AA populations, specifically, it would be beneficial to perform  
517 a TWAS utilizing a well-powered AD GWAS in AA.

518 Our TWAS of AD (from AA GWAS) (24) identified only *TOMM40* and *PVRL2*, both  
519 proximal to *APOE*. *TOMM40* was also identified in our TWAS of AD (from EA GWAS), as  
520 well as other AD GWAS (23,61,62). *PVRL2* has been associated with metabolic syndrome,  
521 diabetic dyslipidemia, and AD(66,67). One study found that polymorphisms in *PVRL2* interact  
522 with variants in *TOMM40* to increase AD risk through pathways related to amyloid-beta  
523 metabolism in older Chinese adults(67). As larger AD GWAS in AA become available, we may  
524 be able to identify additional genes associated with disease while leveraging transcriptomic data  
525 from EA and AA.

526 In our AD EA TWAS, we also identified genes associated with other neurological and  
527 autoimmune diseases including Parkinson's disease (*CYB561*(68) and *SLC25A39*(69)), Crohn's

528 disease (*ATG16L1*(70)), Amyotrophic lateral sclerosis (*SIGLEC9*(71)), and Riboflavin Transport  
529 Deficiency (*SLC52A1*(72)). These diseases have in common the progressive peripheral and  
530 cranial degeneration of neurons that impact processes such as voluntary muscle movement,  
531 vision, hearing and sensation. Although not explicitly identified in Bellenguez et al. (2022)(23),  
532 we also identified genes that were associated with AD in other studies including *RIN3* that is  
533 implicated in tau-mediated pathology, the *MS4A* (*4A* and *6A*) locus associated with mast cell  
534 activation, *TP53INP1* and *ZYX* that have been linked to myeloid enhancer activity(73), and  
535 *APOC4*, which is located proximal to *APOE*(74). We also identified additional genes involved in  
536 B cell autoimmunity (*HLA-DQA2*(75,76) and *CSTF1*(77)), neurodegenerative processes  
537 (*SUPT4H1*(78), *C6orf10*(79), *IKZF1*(80), and *DEDD*(81)), and neuronal growth (*IKZF1*(80) and  
538 *STYX*(82)). Our findings support the hypothesis that chronic activation of immune cells resident  
539 in the brain and peripheral nervous system appear to play a critical role in neuroinflammatory  
540 responses that drive the progression of neurodegeneration in AD.(83) Further, consistent with  
541 findings that AD and VaD often co-exist, our AD TWAS identified genes that were associated  
542 with lacunar and ischemic strokes as well as cerebral small vessel disease in other studies,  
543 including *SLC39A13*(84), *RAPSN*(84), *MAF1*(85), and *MME*(86,87).

544         Although our WMH TWAS identified 12 genes that were not included in the SNP-based  
545 GWAS results mapped to the nearest gene or the gene-based analysis reported in Sargurupremraj  
546 et al. (2020)(22), other studies found associations between *MAP1LC3B*(88), *ARMS2*(89,90) and  
547 *HTRA1*(84) with ischemic stroke, lacunar stroke, and cerebral SVD. The WMH TWAS also  
548 identified genes associated with AD (*ARMS2*(91), atrial fibrillation (*NEURL*(92) and  
549 *GJC1*(93)), innate immunity (*EFTUD2*(94)) and apoptosis and neurodevelopment (*PDCD7*(95),  
550 *FBXO31*(96), and *ClpX*(97)). The 12 unique genes identified for WMH were enriched for DNA



551 binding domain Zinc Finger Protein 690(98), which plays an essential role in gene regulation,  
552 transcription and various cellular processes, and ClpX protein degradation complex(99), which  
553 maintains protein homeostasis. Our findings were consistent with studies that showed  
554 neuroinflammation to be an immunological cascade reaction by glial cells of the central nervous  
555 system where innate immunity resides.

556         While our TWAS for general cognitive function did not show overlapping genes between  
557 the TWAS for AD and VaD, we identified genes associated with general cognitive function that  
558 were not explicitly identified by Davies et al. (2018)(21) which were associated with pre-clinical  
559 AD and VaD risk factors including cardiovascular diseases, immunity and Alzheimer’s  
560 neuropathology. Our TWAS also identified genes previously associated with cognitive domains,  
561 neuropathology, and psychiatric illness including reading-related skills and neural structures  
562 (*SEMA6D*(100) and *SETBP1*(101)), working memory tasks (*CDH13*(102)) and Schizophrenia  
563 (*HP*(103,104), *C18orf1*(105) and *TMEM180*(106)). There are likely also distinct transcriptomic  
564 mechanisms that differentiate cognitive function and normal age-related brain changes from  
565 pathways related to dementia. Individuals who never develop dementia or significant cognitive  
566 decline still experience brain deterioration in normal aging that includes gray and white matter  
567 loss and ventricular enlargement which is accompanied by memory decline(107). Further,  
568 previous GWAS for general cognitive function and AD have shown few overlapping  
569 loci(21,108). In addition, studies of older individuals who are cognitively “resilient” with intact  
570 cognitive function, despite the presence of AD neuropathology, have found the genetic  
571 architecture of cognitive resilience to be distinct from that of AD(109). As such, relatively little  
572 is known about the pathways underlying cognitive aging in those without dementia. Thus,

573 studying transcriptomic mechanisms that affect general cognitive function before development of  
574 dementia may shed light on cognitive aging without dementia.

575 We also compared genes identified by METRO after fine-mapping with those identified  
576 by TWAS-Fusion in Sargurupremraj et al. (2020)(22) and Bellenguez et al. (2022)(23). Among  
577 the 92 genes associated with WMH in Sargurupremraj et al. (2020)(22) and 23 genes identified  
578 by METRO, 10 genes overlapped. We note that the Sargurupremraj et al. (2020)(22) did not  
579 perform fine-mapping of their TWAS results, which is likely why we identified substantially  
580 fewer genes. There were also 10 overlapping genes among the 66 genes associated with AD in  
581 Bellenguez et al. (2022)(23) and 69 genes identified by METRO. For both TWAS comparisons,  
582 a relatively small number of genes overlap likely due to differences in eQTL prediction  
583 modeling. Sargurupremraj et al. (2020)(22) and Bellenguez et al. (2022)(23) used eQTL data  
584 from brain tissue, while we used eQTL data from transformed beta lymphocytes in blood tissue.  
585 While brain tissue is more relevant to WMH and AD phenotypes, blood cells do touch every cell  
586 bed that affects the brain, and are related to chronic inflammation, immunity, and oxidative  
587 stress, which are linked to cognitive performance and dementia. TWAS results from blood tissue  
588 in multiple ancestries provide complementary information to those reported in the GWAS.

589 Several limitations in the present study should be noted. First, our gene expression levels  
590 were measured using transformed B-lymphocytes from immortalized cell lines in GENOA.  
591 While transformed B-lymphocytes are a convenient source of DNA from blood tissue, we lack  
592 eQTL data for tissues that may be most relevant for AD and WMH (e.g., brain tissue, small brain  
593 vessels, and microglia). However, B-lymphocytes provide a unique and efficient way to examine  
594 the functional effects of genetic variations on gene expression that minimizes environmental  
595 influences(110). Second, METRO follows the standard TWAS approach of analyzing one gene

596 at a time. Since genes residing in the same genomic region may share eQTLs or contain eQTL  
597 SNPs that are in LD with each other, the TWAS test statistics of genes in the same region may be  
598 highly correlated. To that end, it may be challenging to identify the truly biologically relevant  
599 genes among them(37,111). As such, we paired METRO with FOCUS to allow us to narrow  
600 down the list of potential causal genes for AD, VaD, and cognitive decline(37,112). Lastly, we  
601 primarily utilized EA GWAS that were publicly available with large sample sizes for general  
602 cognitive function, WMH, and AD. As expected, the gene expression prediction models  
603 constructed in the same ancestry as the GWAS (EA) tended to have larger contribution weights  
604 than AA. While we conducted a TWAS of AD in AA, the sample size of the AA GWAS likely  
605 did not allow us to properly power our TWAS. As such, a future direction would be to conduct  
606 TWAS of these traits using summary statistics from well-powered GWAS with AA ancestry or  
607 multiple ancestries as they become available.

608 Our study also has notable strengths. To our knowledge, our study is the first TWAS  
609 using expression mapping studies in multiple ancestries (EA and AA) to identify genes  
610 associated with cognitive function and neurocognitive disorders. By leveraging the  
611 complementary information in gene expression prediction models constructed in EA and AA, as  
612 well as the uncertainty in SNP prediction weights, we were able to conduct a highly powered  
613 TWAS to identify important gene-trait associations and transcriptomic mechanisms related to  
614 innate immunity, vascular dysfunction and neuroinflammation underlying AD, VaD, and general  
615 cognitive function. Using METRO, we were also able to estimate the ancestry contribution  
616 weights for specific genes and identify the extent to which a gene in EA or AA may contribute to  
617 the trait. However, it is noteworthy that the larger the contribution of the expression prediction  
618 models in the same ancestry as the GWAS (primarily EA, in this study) may allow for better

619 predictive performance in the same ancestry. We also conducted FOCUS fine-mapping to  
620 narrow in on a list of putatively causal genes among multiple significant genes in a region. Our  
621 results suggest that there are similar pathways that contribute to healthy cognitive aging and  
622 progression of dementia, as well as distinct pathways that are unique to each neuropathology. By  
623 understanding overlapping and unique genes and transcriptomic mechanisms associated with  
624 each outcome, we may identify possible targets for prevention and/or treatments for cognitive  
625 aging and dementia.

626

## 627 **Conclusion**

628 In the present study, we conducted a multi-ancestry TWAS in EA and AA to identify  
629 genes associated with general cognitive function, WMH and AD. We identified genes associated  
630 with innate immunity, vascular dysfunction, and neuroinflammation. The WMH and AD TWAS  
631 also indicated that downregulation of *ICAIL* may contribute to overlapping AD and VaD  
632 neuropathology. To our knowledge, this study is the first TWAS analysis using expression  
633 mapping studies in multiple ancestries to identify genes associated with cognitive function and  
634 neurocognitive disorders, which may help to identify gene targets for pharmaceutical or  
635 preventative treatment for dementia.

636

637

638 **Author Contributions:** Conceptualization, D.L.C., J.A.S.; methodology, D.L.C., J.A.S., X.Z.;  
639 software, formal analysis, and investigation, D.L.C., Z.L., L.S., S.M.R.; resources, T.H.M. and  
640 S.L.R.K.; writing—original draft preparation, D.L.C., J.A.S.; writing—review and editing,  
641 D.L.C., S.M.R., W.Z., T.H.M., S.L.R.K., X.Z., J.A.S.; visualization, D.L.C., Z.L.; supervision,  
642 J.A.S.; funding acquisition, S.L.R.K. and J.A.S. All authors have read and agreed to the  
643 published version of the manuscript.

644 **Funding:** Support for the Genetic Epidemiology Network of Arteriopathy (GENOA) was  
645 provided by the National Heart, Lung and Blood Institute (NHLBI, U01HL054457,  
646 RC1HL100185, R01HL087660, R01HL119443, R01HL133221) and the National Institute of  
647 Neurological Disorders and Stroke (NINDS, R01NS041558) of the NIH.

648 **Informed Consent Statement:** Written informed consent was obtained from all subjects  
649 involved in the study.

650 **Data Availability Statement:** The phenotype data and *APOE* genotypes used in the current  
651 study are available upon reasonable request to J.A.S. and S.L.R.K., and with a completed data  
652 use agreement (DUA). All other genotype data are available from the Database of Genotypes and  
653 Phenotypes (dbGaP): phs001401.v2.p1. Methylation and gene expression data are available from  
654 the Gene Expression Omnibus (GEO): GSE210256 and GSE138914. Due to IRB restriction,  
655 mapping of the sample IDs between genotype data (dbGaP) and methylation data (GEO) cannot  
656 be provided publicly, but is available upon written request to J.A.S. and S.L.R.K.

657 **Acknowledgments:** The authors wish to thank the staff and participants of the GENOA study.

658 **Conflicts of Interest:** The authors declare no conflict of interest.

659  
660  
661  
662

663

**Table 1. Sample characteristics of expression quantitative trait locus (eQTL) mapping study and genome-wide association studies (GWAS) participants**

| <i>eQTL mapping study: Genetic Epidemiology Network of Arteriopathy (GENOA)</i>                                                                                                       |                         | Mean (SD) or N (%) or N |
|---------------------------------------------------------------------------------------------------------------------------------------------------------------------------------------|-------------------------|-------------------------|
| N                                                                                                                                                                                     |                         | N=1833                  |
| Age (years)                                                                                                                                                                           |                         | 56.85 (10.0)            |
| Female                                                                                                                                                                                |                         | 1202 (65.6%)            |
| Race/Ethnicity                                                                                                                                                                        |                         |                         |
|                                                                                                                                                                                       | African Americans       | 1032 (56.3%)            |
|                                                                                                                                                                                       | European Americans      | 801 (43.7%)             |
| <i>General cognitive function GWAS: CHARGE, COGENT, UKB<sup>a</sup> (Davies et al., 2018)</i>                                                                                         |                         | Mean (SD) or N (%) or N |
| N                                                                                                                                                                                     |                         | 300,486                 |
| Age (years)                                                                                                                                                                           |                         | 56.91 (7.8)             |
| Female                                                                                                                                                                                |                         | 52.20%                  |
| Excluded for dementia and/or stroke diagnosis                                                                                                                                         |                         | N=4919                  |
| <i>White matter hyperintensity (WMH) GWAS: CHARGE and UKB<sup>a</sup> (Sargurupremraj et al., 2020)</i>                                                                               |                         | Mean (SD) or N (%) or N |
| N                                                                                                                                                                                     |                         | 48,454                  |
| Age (years)                                                                                                                                                                           |                         | 64.17                   |
| Female                                                                                                                                                                                |                         | 29215 (57.6%)           |
| WMH volume (cm <sup>3</sup> )                                                                                                                                                         |                         | 7.06 (8.8)              |
| Excluded for stroke or pathologies                                                                                                                                                    |                         | N=1572                  |
| <i>EA Alzheimer's Disease (AD) GWAS: EADB, GR@ACE, EADI, GERAD/PERADES, DemGene, Bonn, the Rotterdam study, the CCHS study, NxC and the UKB<sup>a</sup> (Bellenguez et al., 2022)</i> |                         | Mean (SD) or N (%) or N |
| Discovery sample                                                                                                                                                                      |                         |                         |
|                                                                                                                                                                                       | AD cases                | N=39,106                |
|                                                                                                                                                                                       | AD proxy cases          | N=46,828                |
|                                                                                                                                                                                       | Controls                | N=401,577               |
| Age (years)                                                                                                                                                                           |                         |                         |
|                                                                                                                                                                                       | AD cases or proxy cases | 73.55 (8.1)             |
|                                                                                                                                                                                       | controls                | 67.86 (8.6)             |
| Female                                                                                                                                                                                |                         |                         |
|                                                                                                                                                                                       | AD cases or proxy cases | 62.90%                  |
|                                                                                                                                                                                       | controls                | 56.10%                  |
| <i>AA Alzheimer's Disease (AD) GWAS: AD Genetics Consortium<sup>b</sup> (Kunkle et al., 2021)</i>                                                                                     |                         | Mean (SD) or N (%) or N |
| N                                                                                                                                                                                     |                         | 7,970                   |
|                                                                                                                                                                                       | AD cases                | 2,748 (34.5%)           |
|                                                                                                                                                                                       | controls                | 5,222 (65.5%)           |
| Age (years)                                                                                                                                                                           |                         | 74.2 (13.6)             |
| Female                                                                                                                                                                                |                         |                         |
|                                                                                                                                                                                       | AD cases                | 1,944 (69.8%)           |
|                                                                                                                                                                                       | controls                | 3,743 (71.7%)           |

664 Abbreviations: EA, European ancestry; AA, African ancestry

665 <sup>a</sup> GWAS include only European ancestry participants.

666 <sup>b</sup> GWAS includes only African ancestry participants.

667

668

**Table 2. Genes for WMH identified both by METRO followed by fine-mapping with FOCUS and by TWAS-Fusion conducted by Sargurupremraj et al. (2020)**

| Gene          | ENSG            | Chr | Start     | End       | Gene Name                                             | Accession number                     |
|---------------|-----------------|-----|-----------|-----------|-------------------------------------------------------|--------------------------------------|
| <i>CALCRL</i> | ENSG00000064989 | 2   | 188206691 | 188313187 | calcitonin receptor like receptor                     | Source: HGNC Symbol; Acc: HGNC:1670  |
| <i>DCAKD</i>  | ENSG00000172992 | 17  | 43100706  | 43138499  | dephospho-CoA kinase domain containing                | Source: HGNC Symbol; Acc: HGNC: 2623 |
| <i>EFEMP1</i> | ENSG00000115380 | 2   | 56093102  | 56151274  | EGF containing fibulin extracellular matrix protein 1 | Source: HGNC Symbol; Acc: HGNC: 3218 |
| <i>GJC1</i>   | ENSG00000182963 | 17  | 42875816  | 42908184  | gap junction protein gamma 1                          | Source: HGNC Symbol; Acc: HGNC: 4280 |
| <i>ICAIL</i>  | ENSG00000163596 | 2   | 203637873 | 203736489 | islet cell autoantigen 1 like                         | Source: HGNC Symbol; Acc: HGNC: 1444 |
| <i>KLHL24</i> | ENSG00000114796 | 3   | 183353398 | 183402307 | kelch like family member 24                           | Source: HGNC Symbol; Acc: HGNC: 2594 |
| <i>NBEAL1</i> | ENSG00000144426 | 2   | 203879331 | 204091101 | neurobeachin like 1                                   | Source: HGNC Symbol; Acc: HGNC: 2068 |
| <i>NEURL</i>  | ENSG00000107954 | 10  | 105253462 | 105352303 | neuralized E3 ubiquitin protein ligase 1              | Source: HGNC Symbol; Acc: HGNC: 7761 |
| <i>NMT1</i>   | ENSG00000136448 | 17  | 43035360  | 43186384  | N-myristoyltransferase 1                              | Source: HGNC Symbol; Acc: HGNC: 7857 |
| <i>WBP2</i>   | ENSG00000132471 | 17  | 73841780  | 73852588  | WW domain binding protein 2                           | Source: HGNC Symbol; Acc: HGNC: 1273 |

669

Abbreviations: HGNC, Human Genome Organisation Gene Nomenclature Committee

670

671 **Table 3. Genes for AD identified both by METRO followed by fine-mapping with FOCUS and by**  
 672 **TWAS-Fusion followed by fine-mapping with FOCUS conducted by Bellenguez et al. (2022)**

| Gene           | ENSG            | Chr | Start     | End       | Gene Name                                      | Accession number                     |
|----------------|-----------------|-----|-----------|-----------|------------------------------------------------|--------------------------------------|
| <i>BLNK</i>    | ENSG00000095585 | 10  | 97948927  | 98031344  | B cell linker                                  | Source:HGNC<br>Symbol;Acc:HGNC:14211 |
| <i>CPSF3</i>   | ENSG00000119203 | 2   | 9563780   | 9613230   | cleavage and polyadenylation specific factor 3 | Source:HGNC<br>Symbol;Acc:HGNC:2326  |
| <i>DDX54</i>   | ENSG00000123064 | 12  | 113594978 | 113623284 | DEAD-box helicase 54                           | Source:HGNC<br>Symbol;Acc:HGNC:20084 |
| <i>GRN</i>     | ENSG00000030582 | 17  | 42422614  | 42430474  | granulin precursor                             | Source:HGNC<br>Symbol;Acc:HGNC:4601  |
| <i>ICA1L</i>   | ENSG00000163596 | 2   | 203637873 | 203736489 | islet cell autoantigen 1 like                  | Source:HGNC<br>Symbol;Acc:HGNC:14442 |
| <i>KLF16</i>   | ENSG00000129911 | 19  | 1852398   | 1863578   | KLF transcription factor 16                    | Source:HGNC<br>Symbol;Acc:HGNC:16857 |
| <i>LACTB</i>   | ENSG00000103642 | 15  | 63414032  | 63434260  | lactamase beta                                 | Source:HGNC<br>Symbol;Acc:HGNC:16468 |
| <i>PPP4C</i>   | ENSG00000149923 | 16  | 30087299  | 30096697  | protein phosphatase 4 catalytic subunit        | Source:HGNC<br>Symbol;Acc:HGNC:9319  |
| <i>SHARPIN</i> | ENSG00000179526 | 8   | 145153536 | 145163027 | SHANK associated RH domain interactor          | Source:HGNC<br>Symbol;Acc:HGNC:25321 |
| <i>TBX6</i>    | ENSG00000149922 | 16  | 30097114  | 30103245  | T-box transcription factor 6                   | Source:HGNC<br>Symbol;Acc:HGNC:11605 |

673 Abbreviations: HGNC, Human Genome Organisation Gene Nomenclature Committee  
 674  
 675



676  
677

(a) General cognitive function from Davies et al. (2018) GWAS

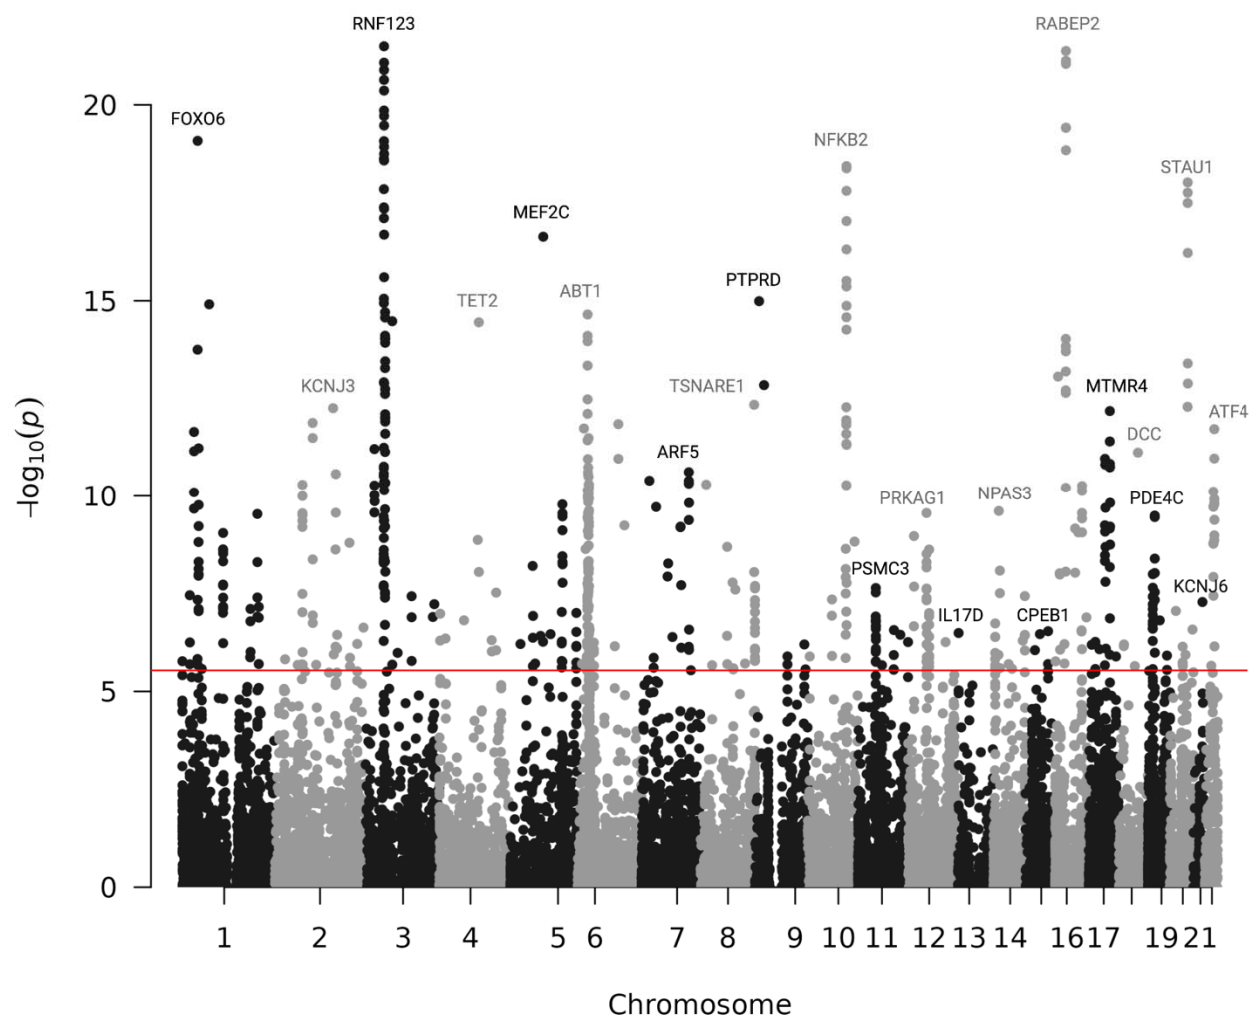

678  
679

680  
681  
682

(b) White matter hyperintensity from Sargurupremraj et al. (2020) GWAS

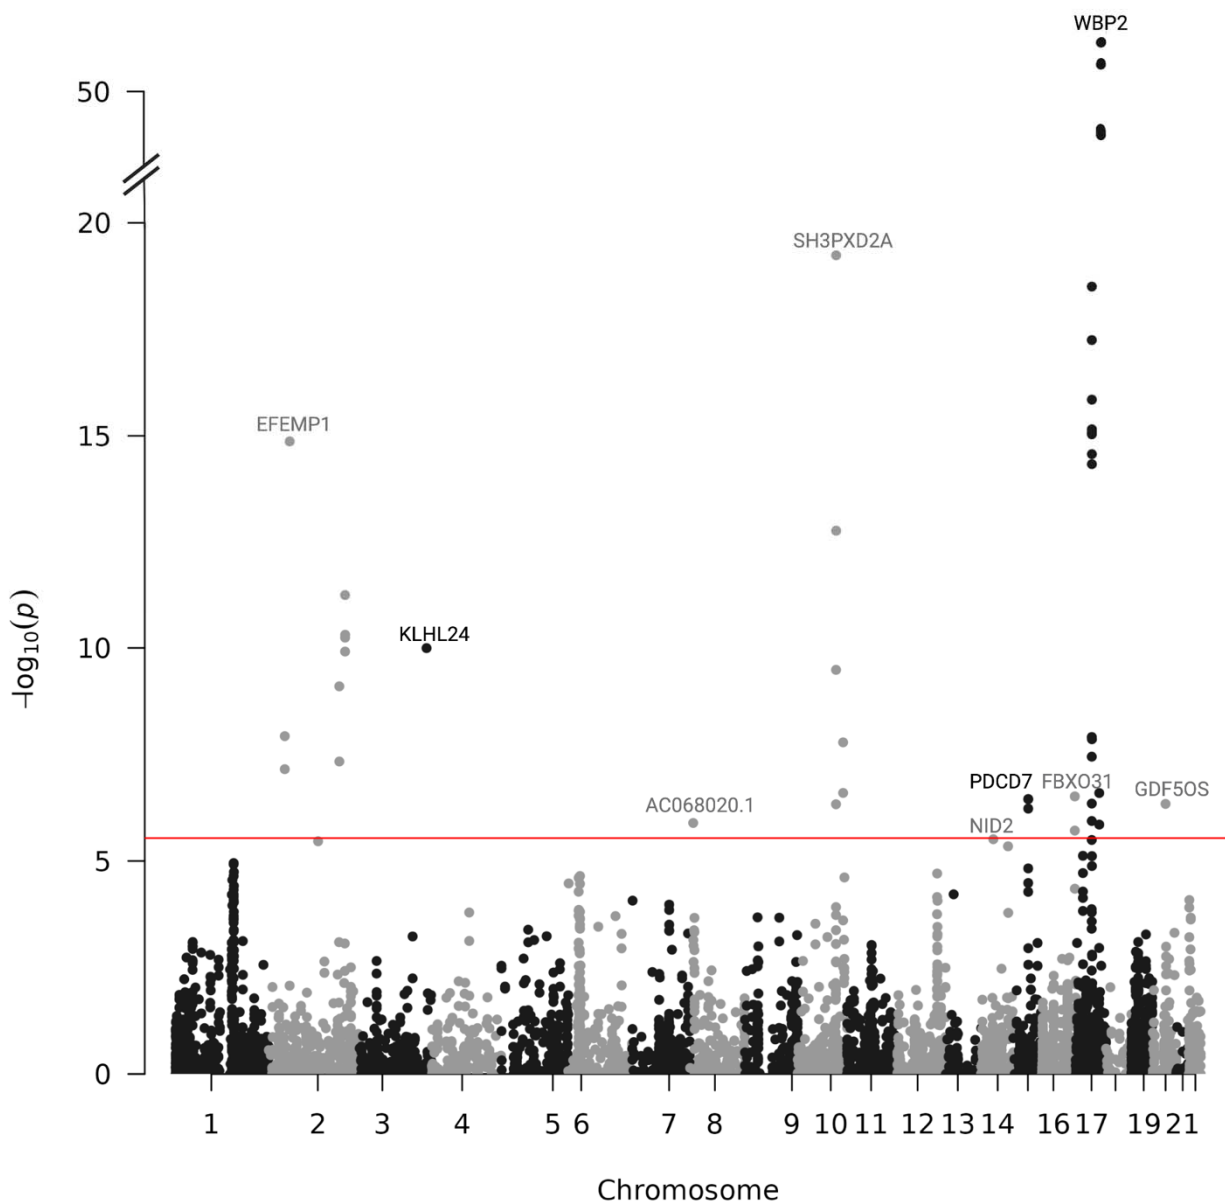

683  
684

685 (c) Alzheimer's Disease from Bellenguez et al. (2022) (EA GWAS sample)

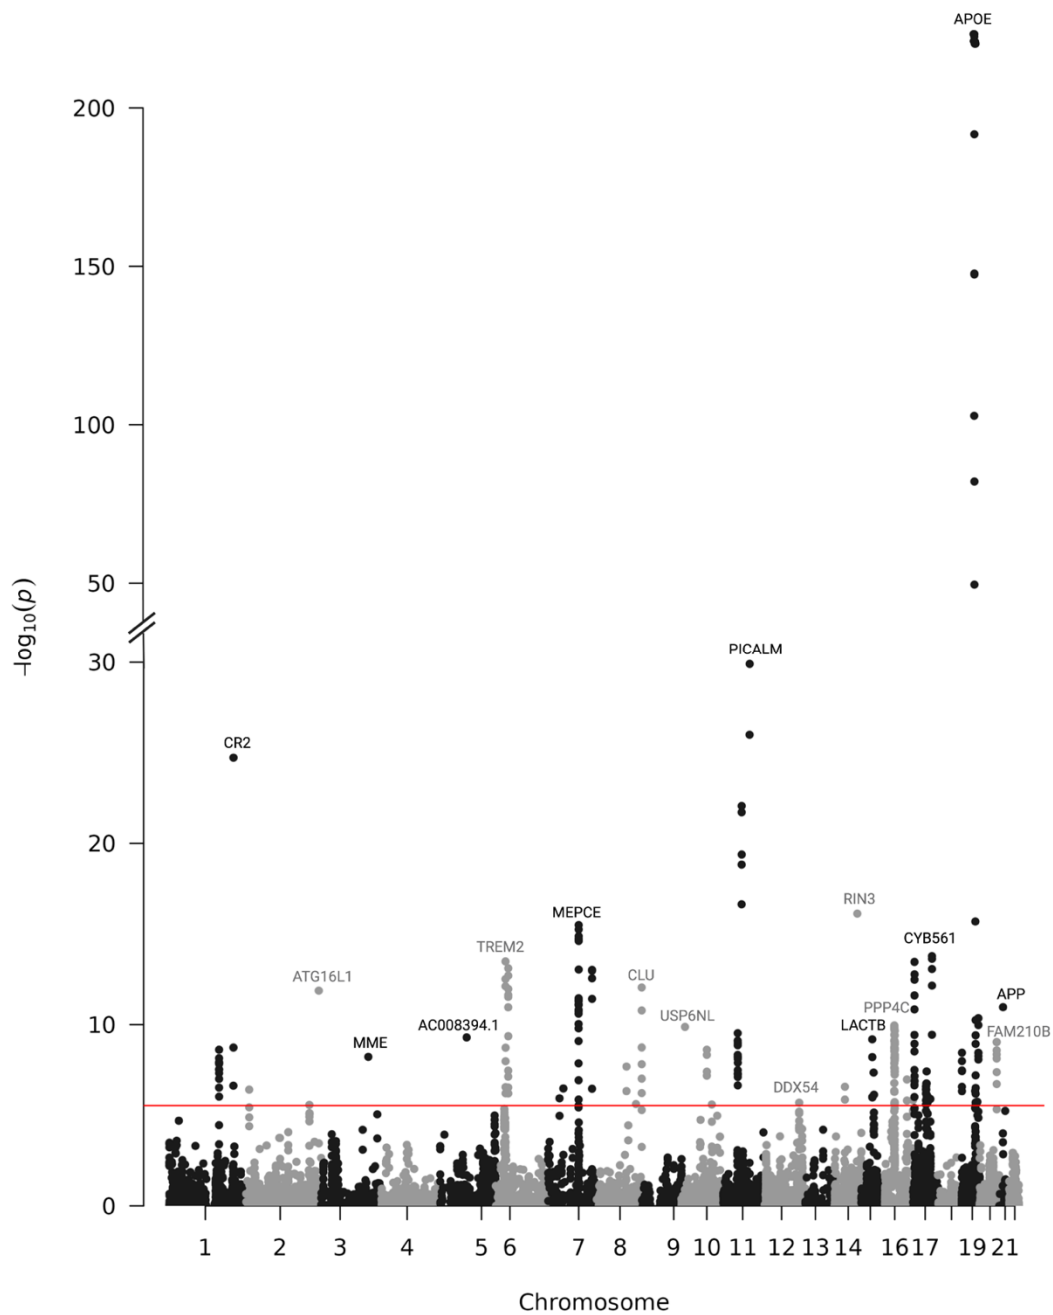

686  
687  
688

689 (d) Alzheimer's Disease from Kunkle et al. (2021) (AA GWAS sample)

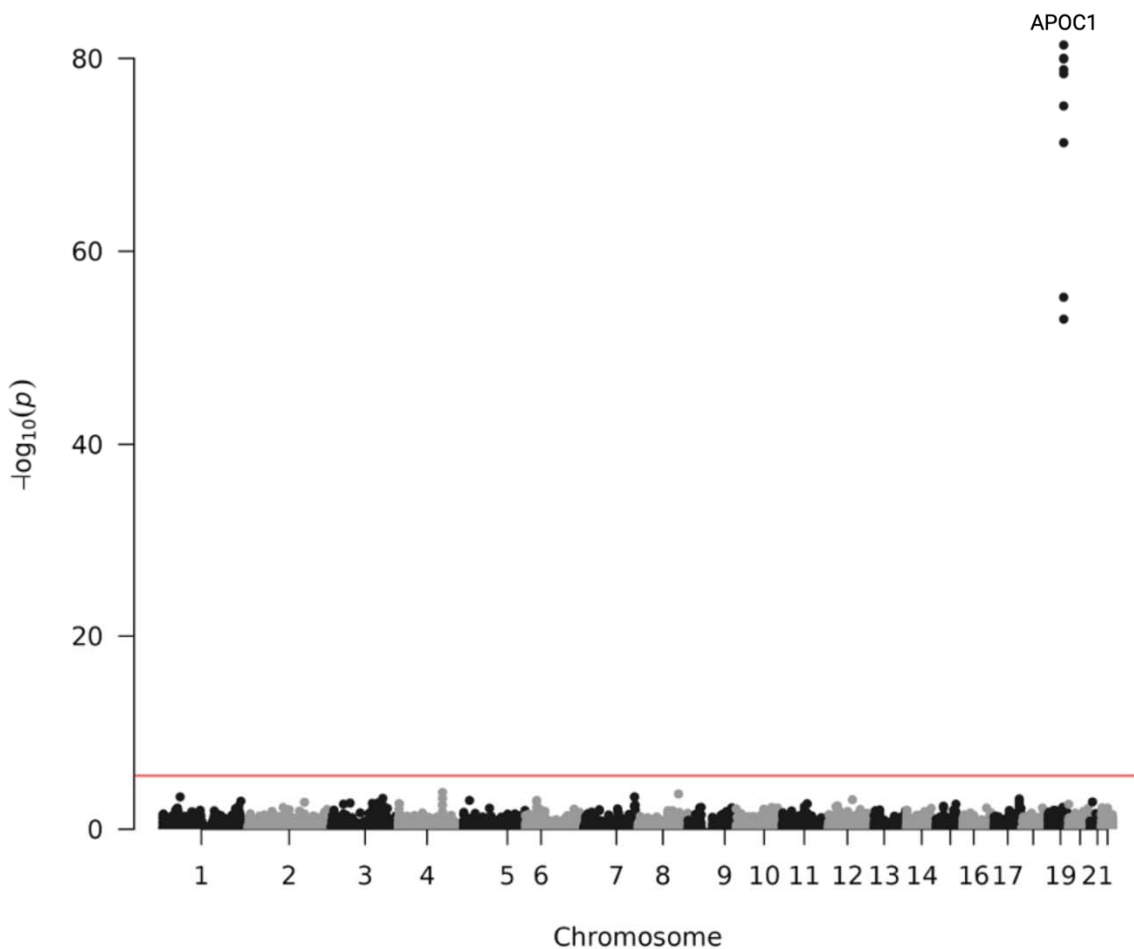

690  
691

692 **Figure 1. Manhattan plots of  $-\log_{10}$  p-values for gene-trait associations in METRO.**  
693 Manhattan plots of the association between genes and (a) general cognitive function using  
694 summary statistics from Davies et al. (2018), (b) White matter hyperintensity from  
695 Sargurupremraj et al. (2020), (c) Alzheimer’s disease from Bellenguez et al. (2022) (EA GWAS  
696 sample) and (d) Alzheimer’s disease from Kunkle et al. (2021) (AA GWAS sample) using  
697 GENOA gene expression data. The red line indicates significance after Bonferroni correction  
698 ( $P < 2.90 \times 10^{-6}$ ).  
699

(a) General cognitive function  
from Davies et al. (2018)

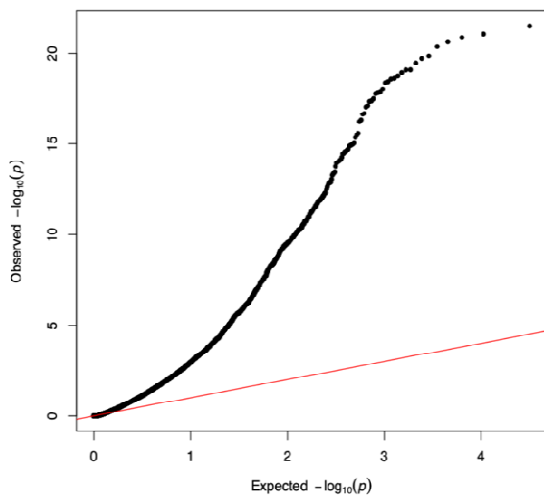

(b) White matter hyperintensity  
from Sargurupremraj et al. (2020)

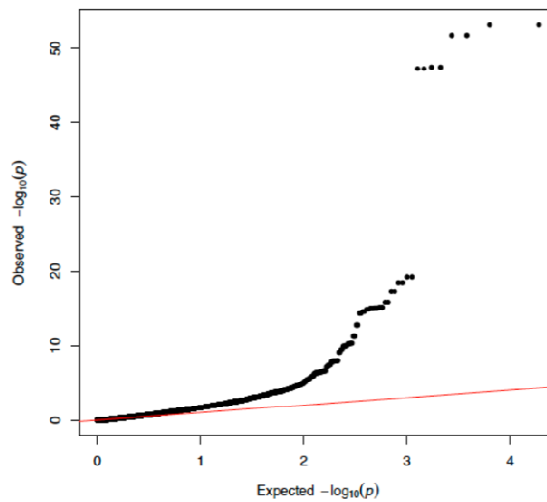

(c) Alzheimer's disease  
from Bellenguez et al. (2022)

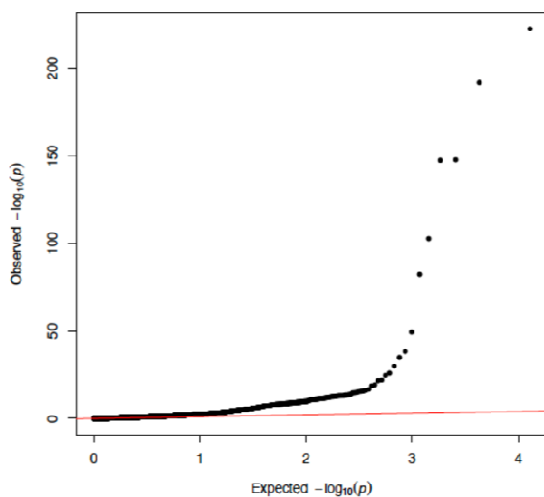

(d) Alzheimer's disease  
from Kunkle et al. (2020)

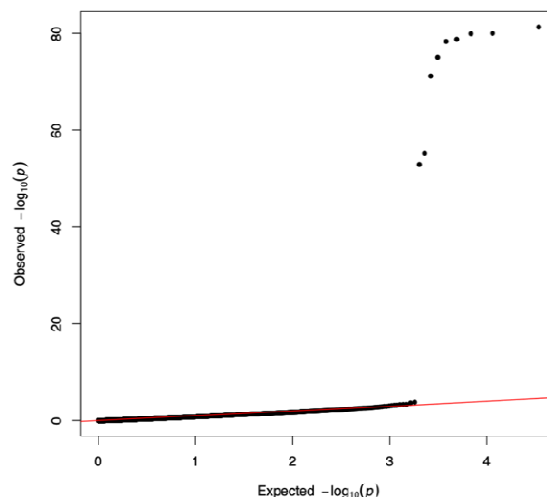

700  
701

702  
703  
704

705 **Figure 2. Quantile-quantile plots of  $-\log_{10}$  p-values for gene-trait associations in METRO.**  
706 Q-Q plots of the associations between genes and (a) general cognitive function ( $\lambda= 2.55$ ) using  
707 summary statistics from Davies et al. (2018), (b) white matter hyperintensity ( $\lambda= 1.45$ ) from  
708 Sargurupremraj et al. (2020), (c) Alzheimer's disease ( $\lambda= 2.09$ ) from Bellenguez et al. (2022)  
709 (EA GWAS sample) and (d) Alzheimer's disease ( $\lambda= 1.0$ ) from Kunkle et al. (2021)(AA GWAS  
710 sample) using GENOA gene expression data.

711  
712

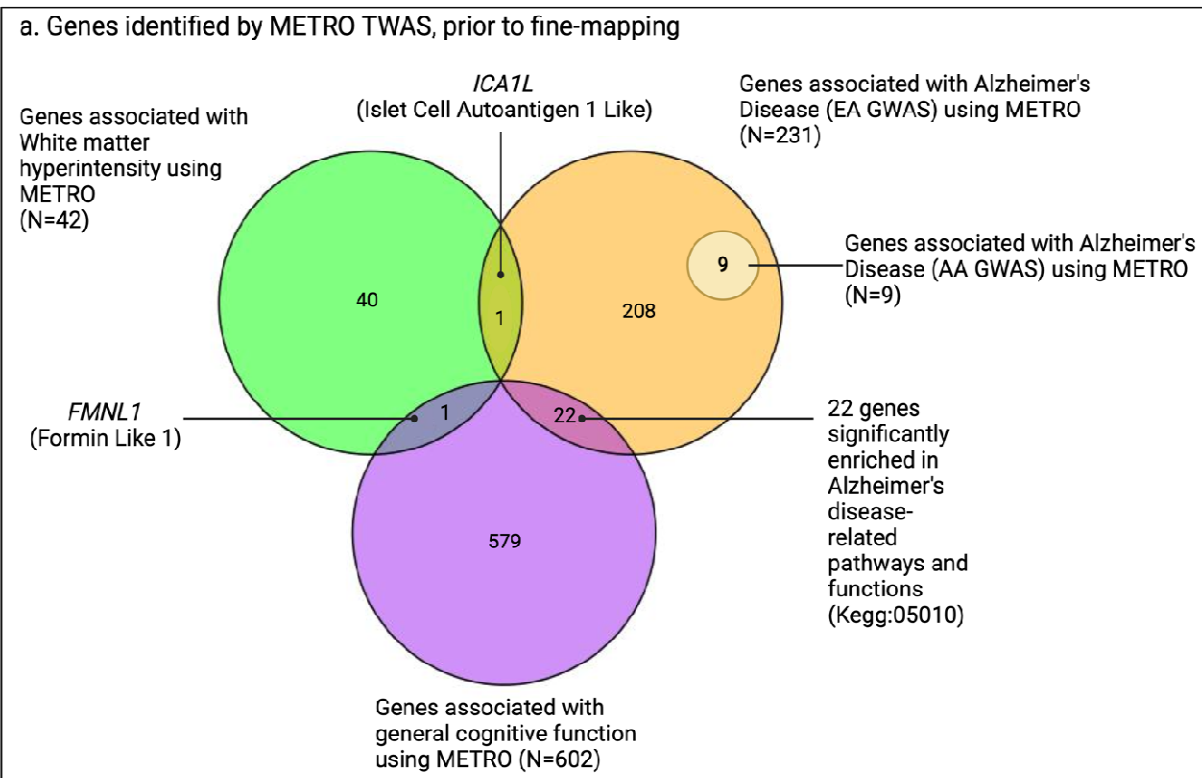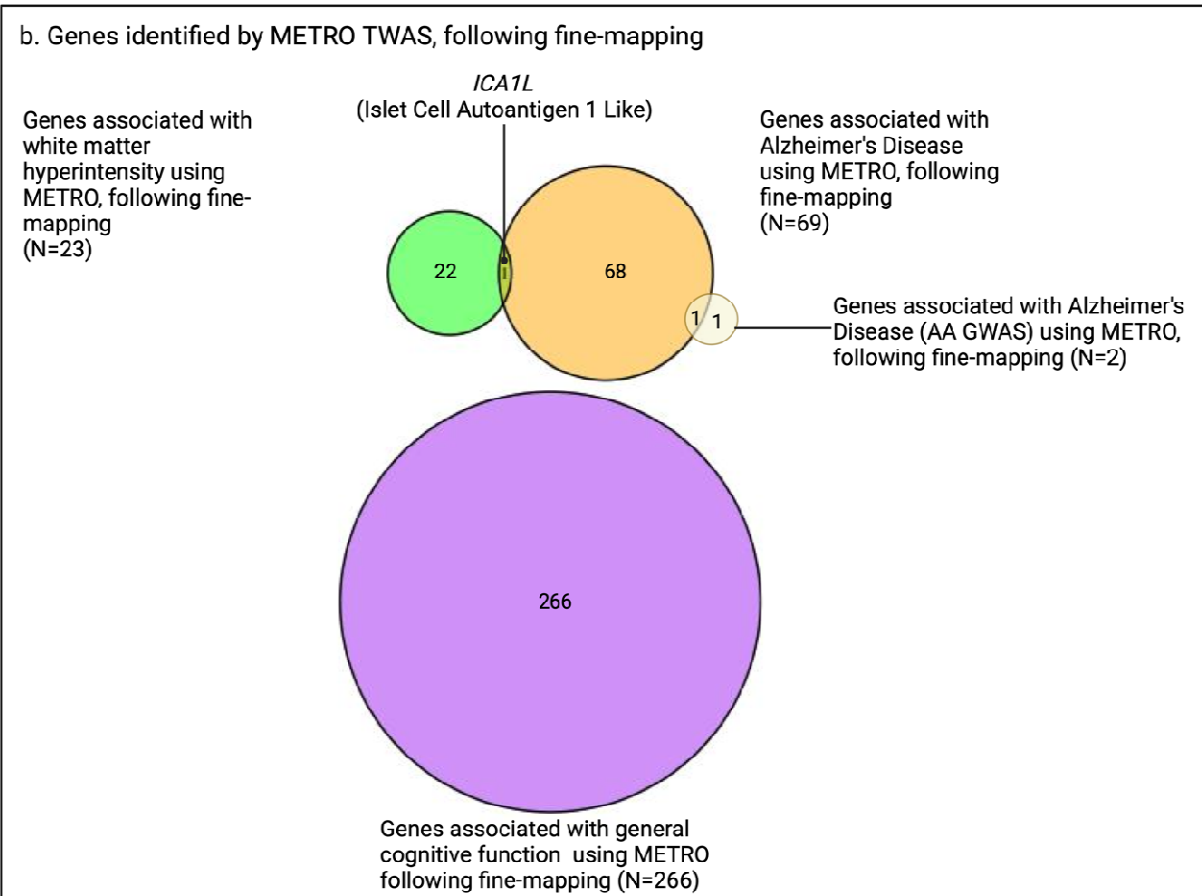

714 **Figure 3. Venn diagrams comparing number of genes associated with general cognitive**  
715 **function, white matter hyperintensity and Alzheimer’s disease (AD) in European ancestry**  
716 **(EA) and AD in African ancestry (AA) using METRO, prior to and following FOCUS fine-**  
717 **mapping.**

718 Venn diagrams comparing the number of genes associated with general cognitive function  
719 (purple; N=266 genes), white matter hyperintensity (WMH; green; N=23 genes) Alzheimer’s  
720 disease (AD) in EA (orange; N=69 genes), and AD in AA (yellow; N=2 genes), (a) prior to  
721 fine-mapping and (b) following FOCUS(5) fine-mapping using METRO and GENOA  
722 expression data after Bonferroni correction ( $P < 2.90 \times 10^{-6}$ ), with GWAS summary statistics  
723 obtained from the Davies et al. (2018), Sargurupremraj et al. (2020), Bellenguez et al. (2022),  
724 and Kunkle et al. (2021).  
725



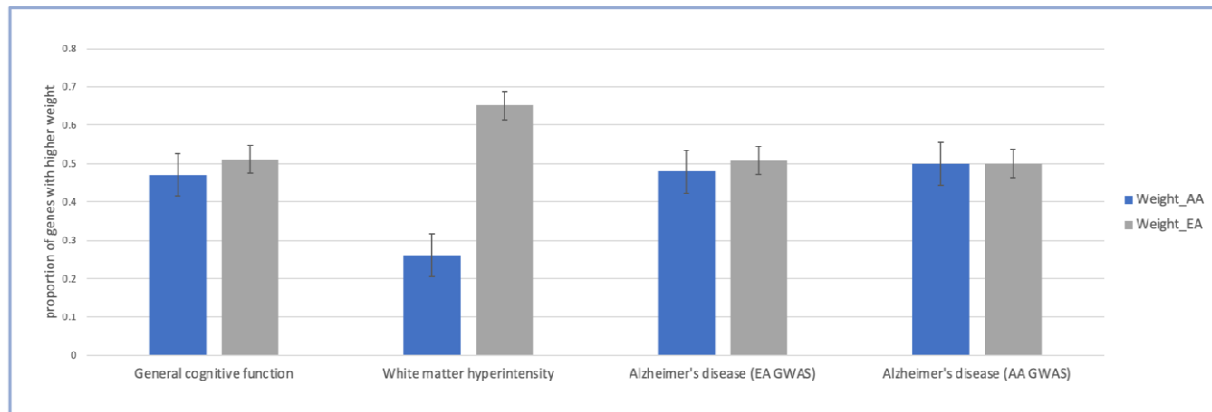

726  
727  
728  
729  
730  
731  
732  
733  
734  
735

**Figure 4. Contribution weights of expression prediction models across all significant fine-mapped genes identified by METRO.**

Barplots of general cognitive function, white matter hyperintensity and Alzheimer's disease (AD) in European ancestry (EA) and AD in African ancestry (AA) comparing the proportion of significant genes with higher contribution weights of expression prediction models across all significant genes ( $P < 2.90 \times 10^{-6}$ ). Black bars are the standard errors for the estimated proportions.

736

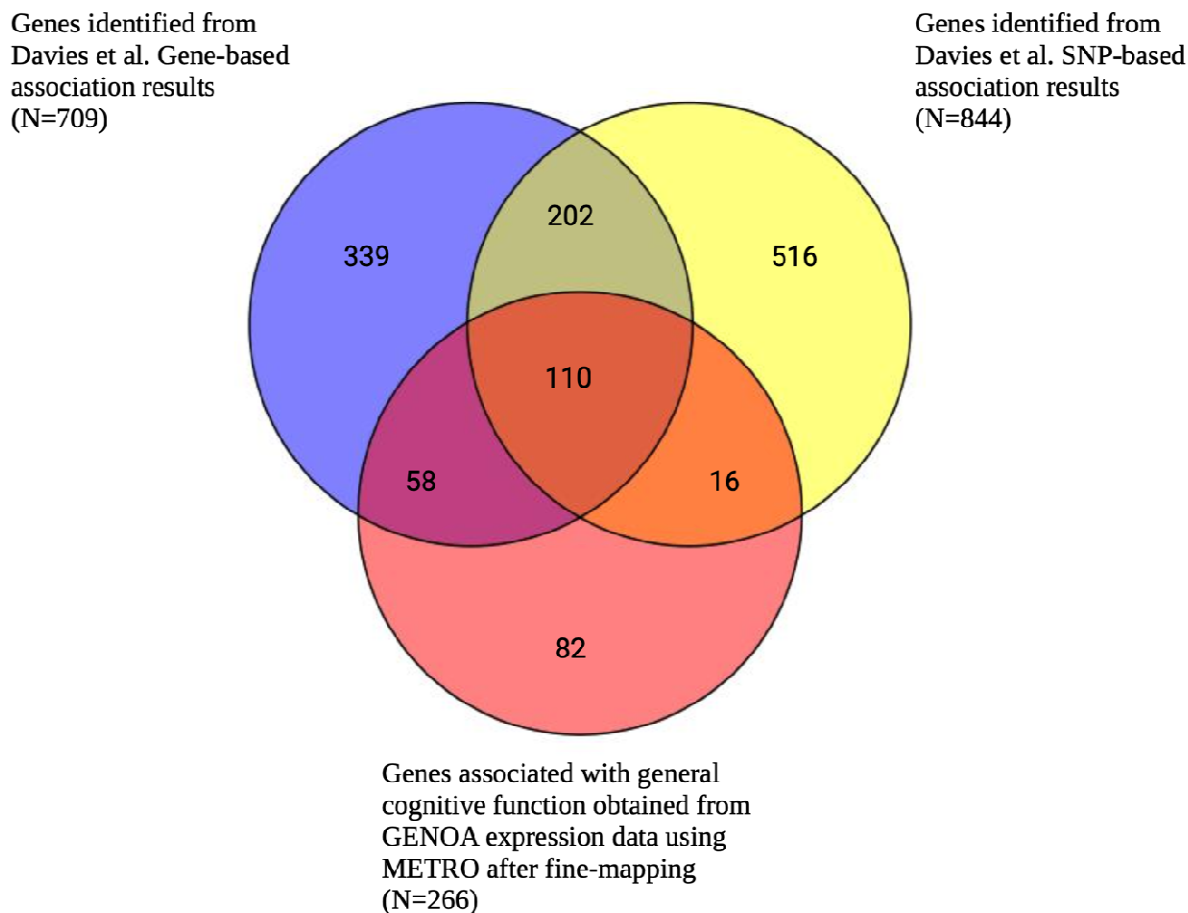

737

738 **Figure 5. Venn diagram comparing number of METRO-identified genes associated with**  
739 **general cognitive function following FOCUS fine-mapping and genes identified by Davies**  
740 **et al. (2018) gene-based and SNP-based analyses.**

741 Venn diagram comparing the number of genes associated with general cognitive function  
742 obtained from METRO using GENOA gene expression data after Bonferroni correction  
743 ( $P < 2.90 \times 10^{-6}$ ) and FOCUS fine-mapping (red) and Davies et al. (2018). Davies et al. results  
744 included SNP-based association results that were mapped to the nearest gene ( $P < 5 \times 10^{-8}$ ; yellow),  
745 and gene-based association results ( $P < 2.75 \times 10^{-6}$ ; blue).

746

747

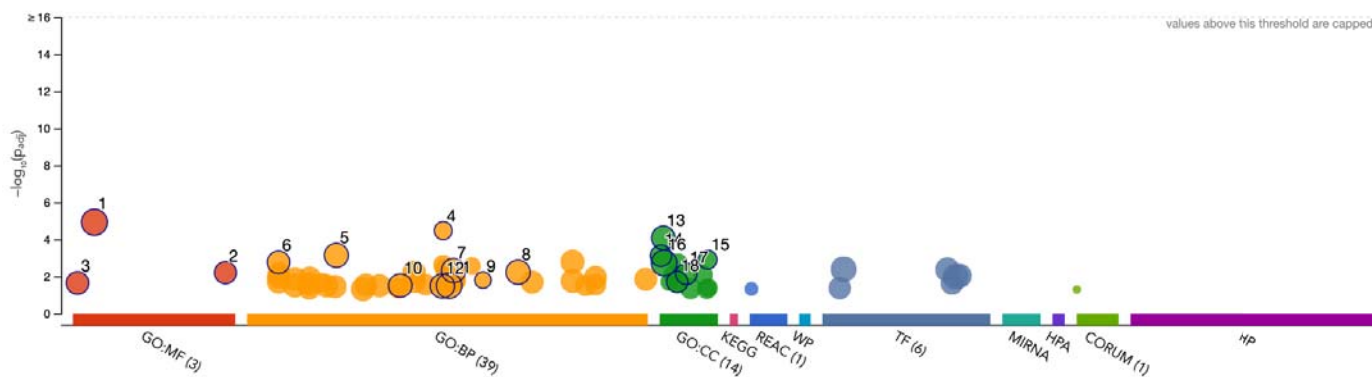

748  
749

| ID    | Term ID    | Term Name                                           | Adjusted P-value |
|-------|------------|-----------------------------------------------------|------------------|
| GO:MF |            |                                                     |                  |
| 1     | GO:0005515 | protein binding                                     | 1.17E-05         |
| 2     | GO:0140110 | Transcription regulator activity                    | 6.23E-03         |
| 3     | GO:0003677 | DNA binding                                         | 2.23E-02         |
| GO:BP |            |                                                     |                  |
| 4     | GO:0048588 | developmental cell growth                           | 3.33E-05         |
| 5     | GO:0019538 | Protein metabolic process                           | 7.18E-04         |
| 6     | GO:0006357 | Regulation of transcription by RNA polymerase II    | 4.79E-03         |
| 7     | GO:0051171 | Regulation of nitrogen compound metabolic processes | 4.79E-03         |
| 8     | GO:0080090 | Regulation of primary metabolic process             | 5.86E-03         |
| 9     | GO:0061387 | Regulation of extent of cell growth                 | 1.56E-02         |
| 10    | GO:0042221 | Response to chemical                                | 3.06E-02         |
| 11    | GO:0050794 | Regulation of cellular process                      | 3.13E-02         |
| 12    | GO:0048518 | Positive regulation of biological process           | 3.24E-02         |
| GO:CC |            |                                                     |                  |
| 13    | GO:0005654 | nucleoplasm                                         | 8.23E-05         |
| 14    | GO:0000785 | chromatin                                           | 7.56E-04         |
| 15    | GO:0098984 | Neuron to neuron synapse                            | 1.22E-03         |
| 16    | GO:0005737 | cytoplasm                                           | 1.84E-03         |
| 17    | GO:0043005 | neuron projection                                   | 7.14E-03         |
| 18    | GO:0031967 | organelle envelope                                  | 1.96E-02         |

750

751 **Figure 6. Functional enrichment analysis on the fine-mapped gene set identified for general**  
 752 **cognitive function using METRO TWAS (N=266 genes).** The top panel consists of a  
 753 Manhattan plot that illustrates the enrichment analysis results. The x-axis represents functional  
 754 terms that are grouped and color-coded by data sources, including Gene Ontology (GO):  
 755 molecular function (MF; red), GO: biological process (BP; orange), GO: cellular component  
 756 (CC; dark green), Kyoto Encyclopedia of Genes and Genomes (KEGG; pink), Reactome  
 757 (REAC; dark blue), WikiPathways (WP; turquoise), Transfac (TF; light blue), MiRTarBase  
 758 (MIRNA; emerald green), Human Protein Atlas (HPA; dark purple), CORUM protein complexes  
 759 (light green), and Human Phenotype Ontology (HP; violet), in order from left to right. The y-axis  
 760 shows the adjusted enriched  $-\log_{10}$  p-values  $<0.05$ . Multiple testing correction was performed  
 761 using g:SCS method (Set Counts and Sizes) that takes into account overlapping terms. The top  
 762 panel highlights driver GO terms identified using the greedy filtering algorithm in g:Profiler. The  
 763 light circles represent terms that were not significant after filtering. The circle sizes are in  
 764 accordance with the corresponding term size (i.e., larger terms have larger circles). The number  
 765 in parentheses following the source name in the x-axis shows how many significantly enriched  
 766 terms were from this source.

767

768  
769  
770

Genes identified from  
Sargurupremraj et al.  
Gene-based association  
results (N=49)

Genes identified from  
Sargurupremraj et al.  
SNP-based association  
results (N=27)

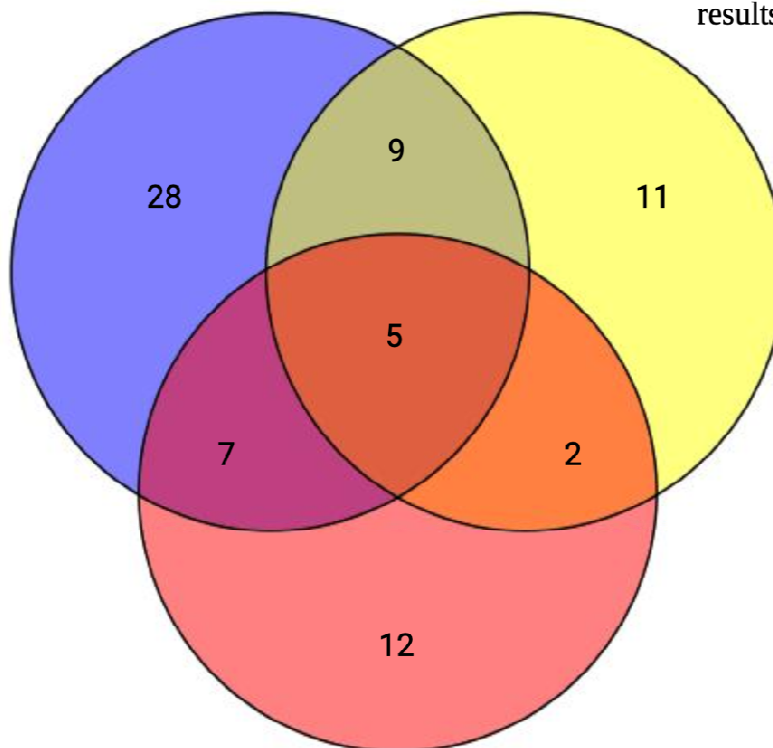

Genes associated with white matter  
hyperintensity obtained from  
GENOA expression data using  
METRO after fine-mapping (N=23)

771

772 **Figure 7. Venn diagram comparing number of METRO-identified genes associated with**  
773 **white matter hyperintensity following FOCUS fine-mapping and genes identified by**  
774 **Sargurupremraj et al. (2020) gene-based and SNP-based analyses.**

775 Venn diagram comparing the number of significantly associated genes associated with white  
776 matter hyperintensity (WMH) obtained from METRO using GENOA expression data after  
777 Bonferroni correction ( $P < 2.90 \times 10^{-6}$ ), and fine-mapping (red) and Sargurupremraj et al. (2020).  
778 Sargurupremraj et al. results included SNP-based association results that were mapped to the  
779 nearest gene ( $P < 5 \times 10^{-8}$ ; yellow), and gene-based association results ( $P < 2.77 \times 10^{-6}$ ; blue).

780  
781  
782

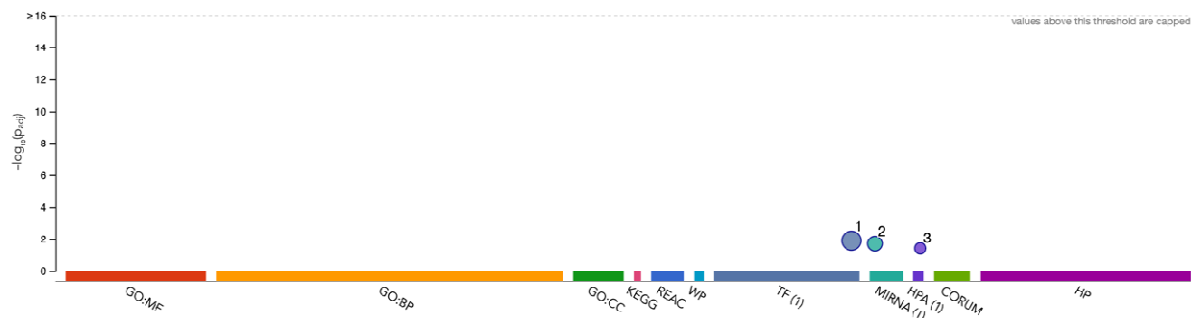

783

| ID | Term ID               | Term Name                               | Adjusted P-value |
|----|-----------------------|-----------------------------------------|------------------|
|    |                       | TF                                      |                  |
| 1  | TF:M12713             | Factor: ZNF690; motif: GTCTACRCNG       | 1.27E-02         |
|    |                       | MIRNA                                   |                  |
| 2  | MIRNA: has-miR-212-5p | hsa-miR-212-5p                          | 1.94E-02         |
|    |                       | HPA                                     |                  |
| 3  | HPA:0411242           | Retina; inner plexiform layer [≥Medium] | 3.86E-02         |

784

785 **Figure 8. Functional enrichment analysis on the fine-mapped gene set identified for white**  
786 **matter hyperintensity using METRO TWAS (N=23 genes).** The top panel consists of a  
787 Manhattan plot that illustrates the enrichment analysis results. The x-axis represents functional  
788 terms that are grouped and color-coded by data sources, including Gene Ontology (GO):  
789 molecular function (MF; red), GO: biological process (BP; orange), GO: cellular component  
790 (CC; dark green), Kyoto Encyclopedia of Genes and Genomes (KEGG; pink), Reactome  
791 (REAC; dark blue), WikiPathways (WP; turquoise), Transfac (TF; light blue), MiRTarBase  
792 (MIRNA; emerald green), Human Protein Atlas (HPA; dark purple), CORUM protein complexes  
793 (light green), and Human Phenotype Ontology (HP; violet), in order from left to right. The y-axis  
794 shows the adjusted enriched  $-\log_{10}$  p-values  $< 0.05$ . Multiple testing correction was performed  
795 using g:SCS method (Set Counts and Sizes) that takes into account overlapping terms. The top  
796 panel highlights driver GO terms identified using the greedy filtering algorithm in g:Profiler. The  
797 light circles represent terms that were not significant after filtering. The circle sizes are in  
798 accordance with the corresponding term size (i.e., larger terms have larger circles). The number  
799 in parentheses following the source name in the x-axis shows how many significantly enriched  
800 terms were from this source.

801

802

803

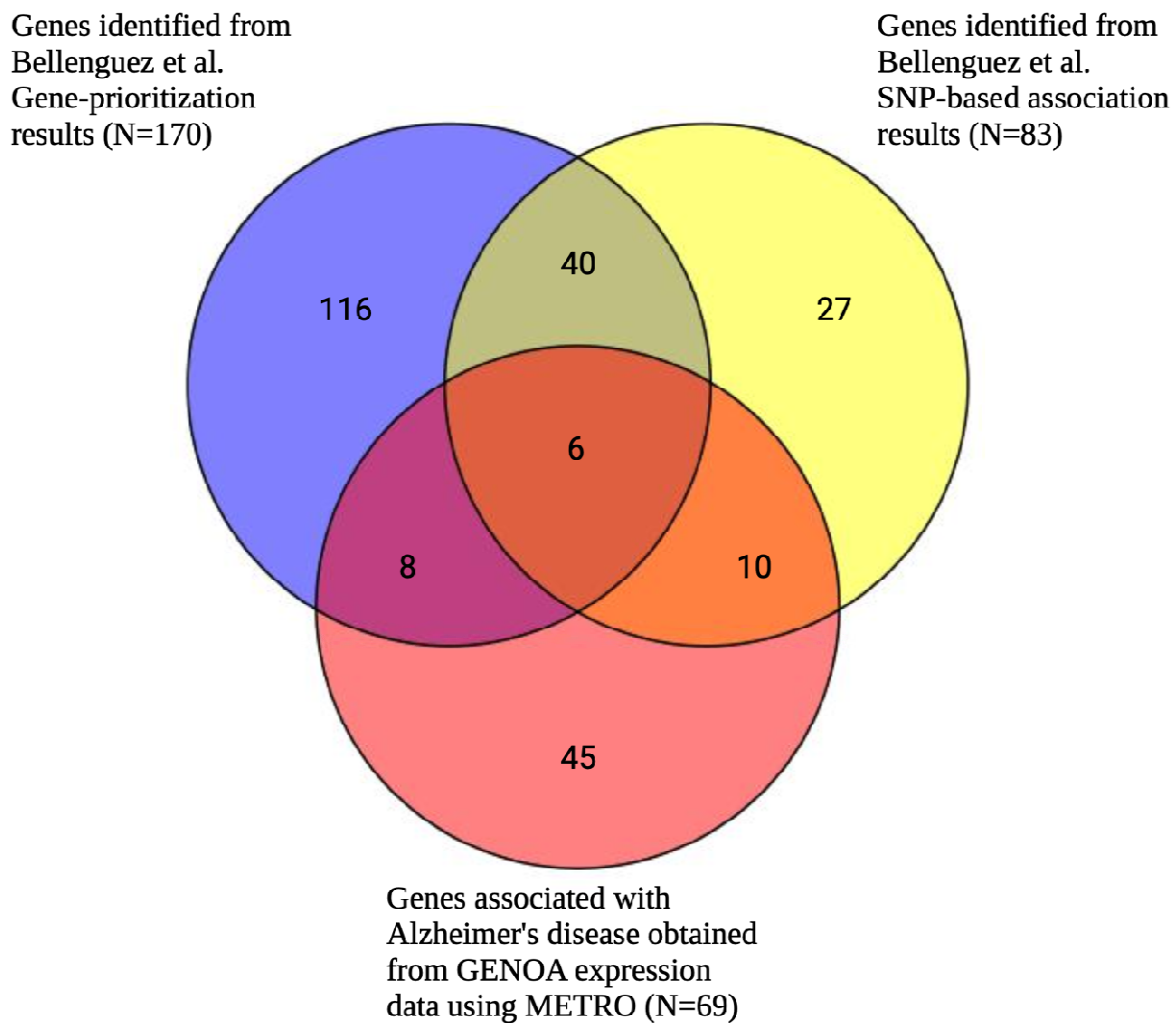

804

805 **Figure 9. Venn diagram comparing number of METRO-identified genes associated with**  
806 **Alzheimer's disease (EA GWAS) following FOCUS fine-mapping and genes identified by**  
807 **Bellenguez et al. (2022) gene prioritization and SNP-based analyses.**

808 Venn diagram comparing the number of significantly associated genes associated with  
809 Alzheimer's disease (from EA GWAS) obtained from METRO using GENOA expression data  
810 after Bonferroni correction ( $P < 2.90 \times 10^{-6}$ ) and fine-mapping (red) and Bellenguez et al. (2022).  
811 Bellenguez et al. results included SNP-based association results that were mapped to the nearest  
812 gene ( $P < 5 \times 10^{-8}$ ; yellow), and gene prioritization results for the genes in the novel AD risk loci  
813 (blue). In the gene prioritization analysis, Bellenguez et al. analyzed the downstream effects of  
814 new AD-associated loci on molecular phenotypes (i.e., expression, splicing, protein expression,  
815 methylation and histone acetylation) in various *cis*-quantitative trait loci (*cis*-QTL) catalogues  
816 from AD-relevant tissues, cell types and brain regions.

817

818

819

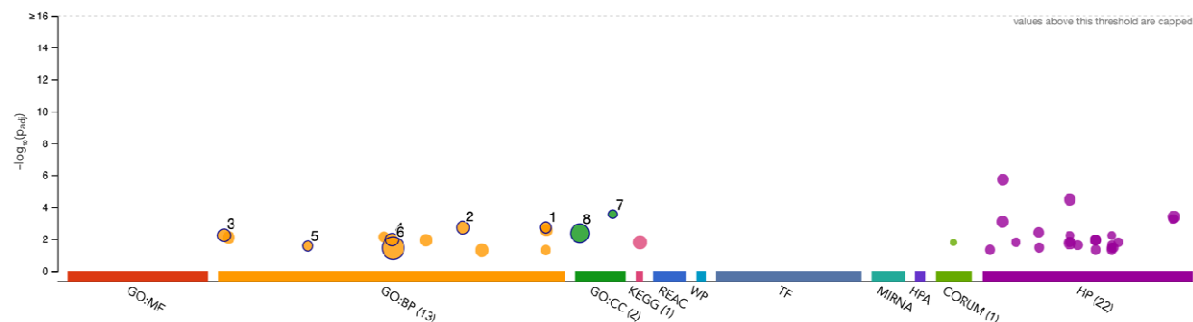

820

| ID    | Term ID    | Term Name                                              | Adjusted P-value |
|-------|------------|--------------------------------------------------------|------------------|
| GO:BP |            |                                                        |                  |
| 1     | GO:1905906 | regulation of amyloid fibril formation                 | 1.87E-03         |
| 2     | GO:0097242 | amyloid-beta clearance                                 | 1.90E-03         |
| 3     | GO:0001774 | microglial cell activation                             | 5.79E-03         |
| 4     | GO:0050435 | amyloid-beta metabolic process                         | 1.07E-02         |
| 5     | GO:0030450 | regulation of complement activation, classical pathway | 2.71E-02         |
| 6     | GO:0050794 | regulation of cellular process                         | 3.60E-02         |
| GO:CC |            |                                                        |                  |
| 7     | GO:0097418 | neurofibrillary tangle                                 | 2.80E-04         |
| 8     | GO:0005794 | Golgi apparatus                                        | 4.39E-03         |

821  
 822 **Figure 10. Functional enrichment analysis on the fine-mapped gene set identified for**  
 823 **Alzheimer’s disease (EA GWAS) using METRO TWAS (N=69 genes).** The top panel consists  
 824 of a Manhattan plot that illustrates the enrichment analysis results. The x-axis represents  
 825 functional terms that are grouped and color-coded by data sources, including Gene Ontology  
 826 (GO): molecular function (MF; red), GO: biological process (BP; orange), GO: cellular  
 827 component (CC; dark green), Kyoto Encyclopedia of Genes and Genomes (KEGG; pink),  
 828 Reactome (REAC; dark blue), WikiPathways (WP; turquoise), Transfac (TF; light blue),  
 829 MiRTarBase (MIRNA; emerald green), Human Protein Atlas (HPA; dark purple), CORUM  
 830 protein complexes (light green), and Human Phenotype Ontology (HP; violet), in order from left  
 831 to right. The y-axis shows the adjusted enriched  $-\log_{10}$  p-values  $< 0.05$ . Multiple testing  
 832 correction was performed using g:SCS method (Set Counts and Sizes) that takes into account  
 833 overlapping terms. The top panel highlights driver GO terms identified using the greedy filtering  
 834 algorithm in g:Profiler. The light circles represent terms that were not significant after filtering.  
 835 The circle sizes are in accordance with the corresponding term size (i.e., larger terms have larger  
 836 circles). The number in parentheses following the source name in the x-axis shows how many  
 837 significantly enriched terms were from this source.

838  
 839

840  
841

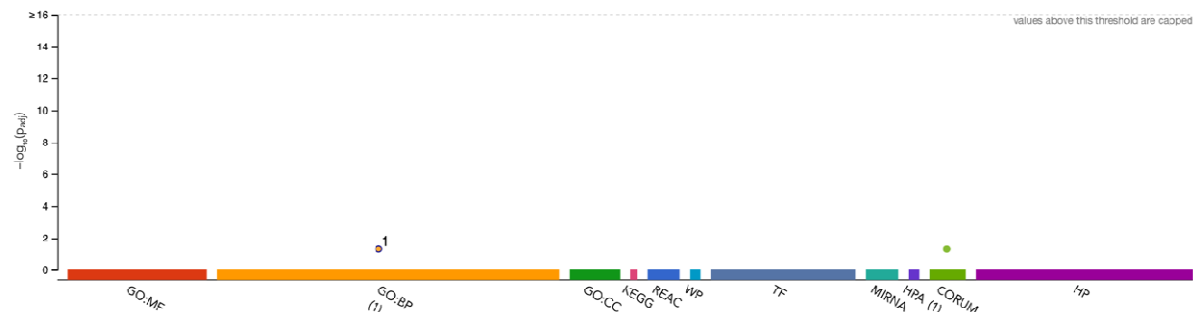

842

| ID | Term ID    | Term Name                                     | Adjusted P-value |
|----|------------|-----------------------------------------------|------------------|
| 1  | GO:0046814 | Coreceptor-mediated virion attachment to host | 4.96E-02         |

843

844 **Figure 11. Functional enrichment analysis fine-mapped gene set identified for Alzheimer’s**  
 845  **disease (AA GWAS) using METRO TWAS (N=2 genes).** The top panel consists of a  
 846 Manhattan plot that illustrates the enrichment analysis results. The x-axis represents functional  
 847 terms that are grouped and color-coded by data sources, including Gene Ontology (GO):  
 848 molecular function (MF; red), GO: biological process (BP; orange), GO: cellular component  
 849 (CC; dark green), Kyoto Encyclopedia of Genes and Genomes (KEGG; pink), Reactome  
 850 (REAC; dark blue), WikiPathways (WP; turquoise), Transfac (TF; light blue), MiRTarBase  
 851 (MIRNA; emerald green), Human Protein Atlas (HPA; dark purple), CORUM protein complexes  
 852 (light green), and Human Phenotype Ontology (HP; violet), in order from left to right. The y-axis  
 853 shows the adjusted enriched  $-\log_{10}$  p-values  $< 0.05$ . Multiple testing correction was performed  
 854 using g:SCS method (Set Counts and Sizes) that takes into account overlapping terms. The top  
 855 panel highlights driver GO terms identified using the greedy filtering algorithm in g:Profiler. The  
 856 light circles represent terms that were not significant after filtering. The circle sizes are in  
 857 accordance with the corresponding term size (i.e., larger terms have larger circles). The number  
 858 in parentheses following the source name in the x-axis shows how many significantly enriched  
 859 terms were from this source.

860  
861  
862



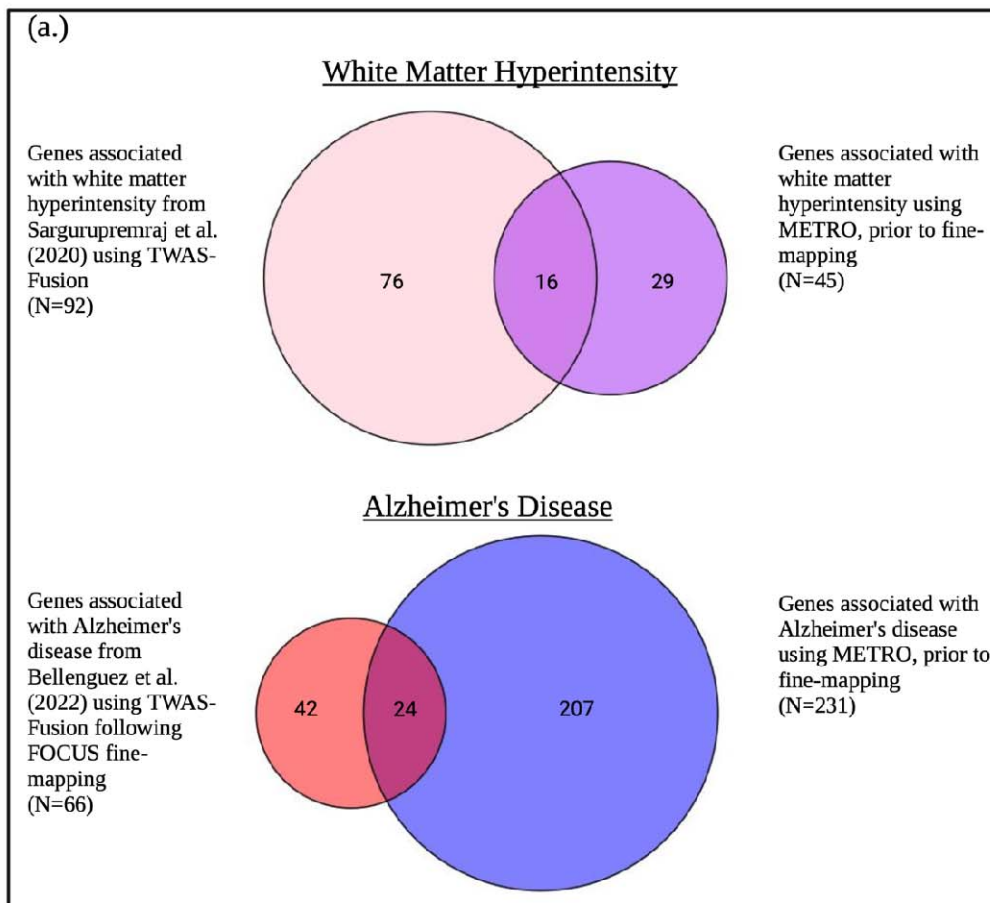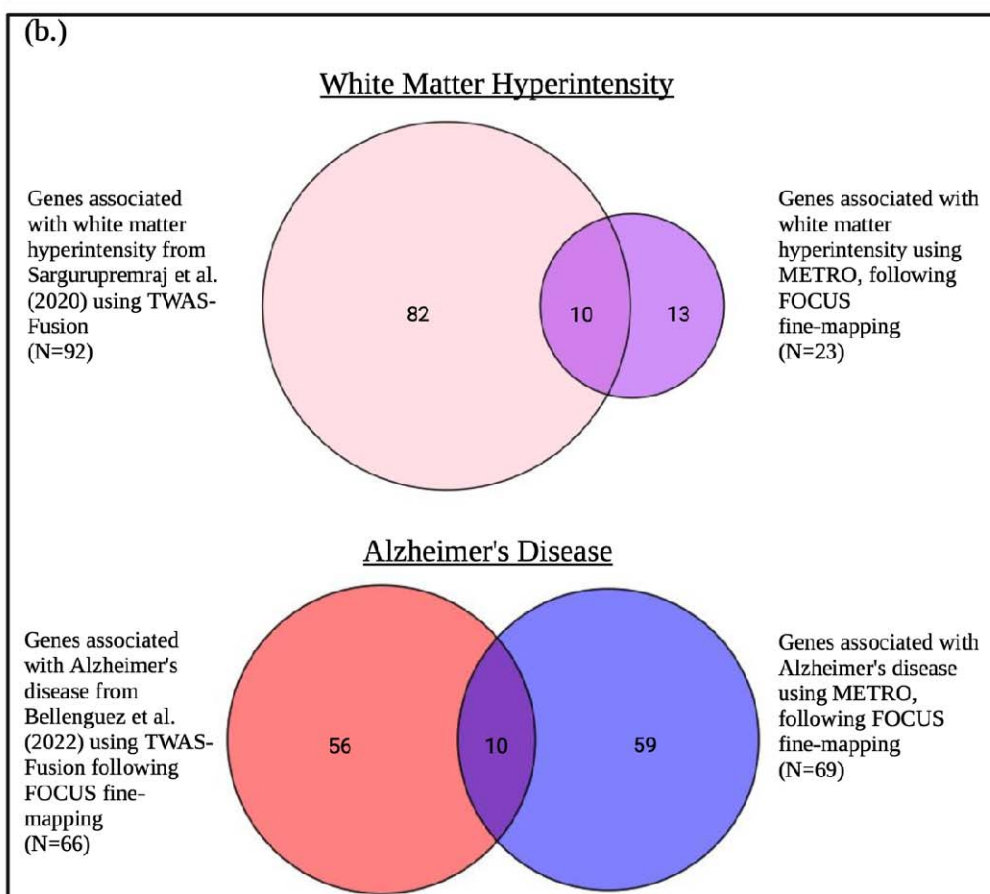

864 **Figure 12. Venn diagram comparing METRO TWAS results prior to and following**  
865 **FOCUS fine-mapping with TWAS results from Sargurupremraj et al. (2020) and**  
866 **Bellenguez et al. (2022).**

867 Venn diagram comparing METRO TWAS results (a) prior to and (b) following FOCUS fine-  
868 mapping with TWAS results using Fusion for white matter hyperintensity from Sargurupremraj  
869 et al. (2020) without fine-mapping and Alzheimer's disease from Bellenguez et al. (2022) (EA  
870 GWAS) with FOCUS fine-mapping.

871  
872

873 **References**

- 874
- 875 1. 2023 Alzheimer's disease facts and figures. *Alzheimer's & Dementia*. 2023 Apr;19(4):1598–
- 876 695.
- 877 2. De Reuck J, Maurage CA, Deramecourt V, Pasquier F, Cordonnier C, Leys D, et al. Aging
- 878 and cerebrovascular lesions in pure and in mixed neurodegenerative and vascular dementia
- 879 brains: a neuropathological study. *Folia Neuropathol*. 2018;56(2):81–7.
- 880 3. Hof PR, Glannakopoulos P, Bouras C. The neuropathological changes associated with
- 881 normal brain aging. *Histol Histopathol*. 1996 Oct;11(4):1075–88.
- 882 4. Perl DP. Neuropathology of Alzheimer's Disease. *Mt Sinai J Med*. 2010;77(1):32–42.
- 883 5. Cohuet G, Struijker-Boudier H. Mechanisms of target organ damage caused by hypertension:
- 884 Therapeutic potential. *Pharmacology & Therapeutics*. 2006 Jul 1;111(1):81–98.
- 885 6. Weller J, Budson A. Current understanding of Alzheimer's disease diagnosis and treatment.
- 886 *F1000Res*. 2018 Jul 31;7:F1000 Faculty Rev-1161.
- 887 7. Hubbard BM, Fenton GW, Anderson JM. A quantitative histological study of early clinical
- 888 and preclinical Alzheimer's disease. *Neuropathol Appl Neurobiol*. 1990 Apr;16(2):111–21.
- 889 8. Sperling RA, Aisen PS, Beckett LA, Bennett DA, Craft S, Fagan AM, et al. Toward defining
- 890 the preclinical stages of Alzheimer's disease: recommendations from the National Institute
- 891 on Aging-Alzheimer's Association workgroups on diagnostic guidelines for Alzheimer's
- 892 disease. *Alzheimers Dement*. 2011 May;7(3):280–92.
- 893 9. Mayeda ER, Glymour MM, Quesenberry CP, Whitmer RA. Inequalities in dementia
- 894 incidence between six racial and ethnic groups over 14 years. *Alzheimers Dement*. 2016
- 895 Mar;12(3):216–24.
- 896 10. Barnes LL, Bennett DA. Alzheimer's disease in African Americans: risk factors and
- 897 challenges for the future. *Health Aff (Millwood)*. 2014 Apr;33(4):580–6.
- 898 11. Brewster P, Barnes L, Haan M, Johnson JK, Manly JJ, Nápoles AM, et al. Progress and
- 899 future challenges in aging and diversity research in the United States. *Alzheimers Dement*.
- 900 2019 Jul;15(7):995–1003.
- 901 12. Rajan KB, Weuve J, Barnes LL, Wilson RS, Evans DA. Prevalence and incidence of
- 902 clinically diagnosed Alzheimer's disease dementia from 1994 to 2012 in a population
- 903 study. *Alzheimers Dement*. 2019 Jan;15(1):1–7.
- 904 13. Cacabelos R, Torrellas C. Epigenetics of Aging and Alzheimer's Disease: Implications for
- 905 Pharmacogenomics and Drug Response. *International Journal of Molecular Sciences*. 2015
- 906 Dec;16(12):30483–543.

- 907 14. Tam V, Patel N, Turcotte M, Bossé Y, Paré G, Meyre D. Benefits and limitations of genome-  
908 wide association studies. *Nat Rev Genet.* 2019 Aug;20(8):467–84.
- 909 15. Lappalainen T, Sammeth M, Friedländer MR, ‘t Hoen PA, Monlong J, Rivas MA, et al.  
910 Transcriptome and genome sequencing uncovers functional variation in humans. *Nature.*  
911 2013 Sep 26;501(7468):506–11.
- 912 16. Mogil LS, Andaleon A, Badalamenti A, Dickinson SP, Guo X, Rotter JJ, et al. Genetic  
913 architecture of gene expression traits across diverse populations. *PLOS Genetics.* 2018 Aug  
914 10;14(8):e1007586.
- 915 17. Wojcik G, Graff M, Nishimura K, Tao R, Haessler J, Gignoux C, et al. Genetic analyses of  
916 diverse populations improves discovery for complex traits. *Nature.* 2019;570(7762):514–8.
- 917 18. Shang L, Smith JA, Zhao W, Kho M, Turner ST, Mosley TH, et al. Genetic Architecture of  
918 Gene Expression in European and African Americans: An eQTL Mapping Study in  
919 GENOA. *Am J Hum Genet.* 2020 Apr 2;106(4):496–512.
- 920 19. Nica AC, Dermitzakis ET. Expression quantitative trait loci: present and future. *Philos Trans*  
921 *R Soc Lond B Biol Sci.* 2013 Jun 19;368(1620):20120362.
- 922 20. Li Z, Zhao W, Shang L, Mosley TH, Kardia SLR, Smith JA, et al. METRO: Multi-ancestry  
923 transcriptome-wide association studies for powerful gene-trait association detection. *The*  
924 *American Journal of Human Genetics.* 2022 May 5;109(5):783–801.
- 925 21. Davies G, Lam M, Harris SE, Trampush JW, Luciano M, Hill WD, et al. Study of 300,486  
926 individuals identifies 148 independent genetic loci influencing general cognitive function.  
927 *Nat Commun.* 2018 May 29;9(1):2098.
- 928 22. Sargurupremraj M, Suzuki H, Jian X, Sarnowski C, Evans TE, Bis JC, et al. Cerebral small  
929 vessel disease genomics and its implications across the lifespan. *Nature Communications.*  
930 2020 Dec 8;11(1):6285.
- 931 23. Bellenguez C, Küçükali F, Jansen IE, Kleindam L, Moreno-Grau S, Amin N, et al. New  
932 insights into the genetic etiology of Alzheimer’s disease and related dementias. *Nat Genet.*  
933 2022 Apr 4;1–25.
- 934 24. Kunkle BW, Schmidt M, Klein HU, Naj AC, Hamilton-Nelson KL, Larson EB, et al. Novel  
935 Alzheimer Disease Risk Loci and Pathways in African American Individuals Using the  
936 African Genome Resources Panel: A Meta-analysis. *JAMA Neurol.* 2021 Jan 1;78(1):102–  
937 13.
- 938 25. Daniels PR, Kardia SLR, Hanis CL, Brown CA, Hutchinson R, Boerwinkle E, et al. Familial  
939 aggregation of hypertension treatment and control in the Genetic Epidemiology Network of  
940 Arteriopathy (GENOA) study. *Am J Med.* 2004 May 15;116(10):676–81.
- 941 26. Delaneau O, Zagury JF, Marchini J. Improved whole-chromosome phasing for disease and  
942 population genetic studies. *Nat Methods.* 2013 Jan;10(1):5–6.

- 943 27. Howie BN, Donnelly P, Marchini J. A Flexible and Accurate Genotype Imputation Method  
944 for the Next Generation of Genome-Wide Association Studies. *PLOS Genetics*. 2009 Jun  
945 19;5(6):e1000529.
- 946 28. Gogarten SM, Sofer T, Chen H, Yu C, Brody JA, Thornton TA, et al. Genetic association  
947 testing using the GENESIS R/Bioconductor package. *Bioinformatics*. 2019;35(24):5346–8.
- 948 29. Lockstone HE. Exon array data analysis using Affymetrix power tools and R statistical  
949 software. *Briefings in Bioinformatics*. 2011 Nov 1;12(6):634–44.
- 950 30. Irizarry RA, Bolstad BM, Collin F, Cope LM, Hobbs B, Speed TP. Summaries of Affymetrix  
951 GeneChip probe level data. *Nucleic Acids Research*. 2003 Feb 15;31(4):e15.
- 952 31. Dai M, Wang P, Boyd AD, Kostov G, Athey B, Jones EG, et al. Evolving gene/transcript  
953 definitions significantly alter the interpretation of GeneChip data. *Nucleic Acids Research*.  
954 2005 Nov 1;33(20):e175.
- 955 32. Johnson WE, Li C, Rabinovic A. Adjusting batch effects in microarray expression data using  
956 empirical Bayes methods. *Biostatistics*. 2007 Jan 1;8(1):118–27.
- 957 33. Harrow J, Frankish A, Gonzalez JM, Tapanari E, Diekhans M, Kokocinski F, et al.  
958 GENCODE: the reference human genome annotation for The ENCODE Project. *Genome*  
959 *research*. 2012;22(9):1760–74.
- 960 34. Gusev A, Ko A, Shi H, Bhatia G, Chung W, Penninx BWJH, et al. Integrative approaches for  
961 large-scale transcriptome-wide association studies. *Nat Genet*. 2016 Mar;48(3):245–52.
- 962 35. Barbeira AN, Bonazzola R, Gamazon ER, Liang Y, Park Y, Kim-Hellmuth S, et al.  
963 Exploiting the GTEx resources to decipher the mechanisms at GWAS loci. *Genome*  
964 *Biology*. 2021 Jan 26;22(1):49.
- 965 36. THE GTEx CONSORTIUM. The GTEx Consortium atlas of genetic regulatory effects  
966 across human tissues. *Science*. 2020 Sep 11;369(6509):1318–30.
- 967 37. Mancuso N, Freund MK, Johnson R, Shi H, Kichaev G, Gusev A, et al. Probabilistic fine-  
968 mapping of transcriptome-wide association studies. *Nature genetics*. 2019;51(4):675–82.
- 969 38. Turner SD. qqman: an R package for visualizing GWAS results using Q-Q and manhattan  
970 plots [Internet]. *bioRxiv*; 2014 [cited 2023 Jun 6]. p. 005165. Available from:  
971 <https://www.biorxiv.org/content/10.1101/005165v1>
- 972 39. Berisa T, Pickrell JK. Approximately independent linkage disequilibrium blocks in human  
973 populations. *Bioinformatics*. 2016;32(2):283.
- 974 40. Chen H, Boutros PC. VennDiagram: a package for the generation of highly-customizable  
975 Venn and Euler diagrams in R. *BMC Bioinformatics*. 2011 Jan 26;12(1):35.

- 976 41. de Leeuw CA, Stringer S, Dekkers IA, Heskes T, Posthuma D. Conditional and interaction  
977 gene-set analysis reveals novel functional pathways for blood pressure. *Nat Commun.* 2018  
978 Sep 14;9(1):3768.
- 979 42. Mancarcı BO. Gene Synonym [Internet]. 2022 [cited 2023 Jul 6]. Available from:  
980 <https://github.com/oganm/geneSynonym>
- 981 43. Raudvere U, Kolberg L, Kuzmin I, Arak T, Adler P, Peterson H, et al. g:Profiler: a web  
982 server for functional enrichment analysis and conversions of gene lists (2019 update).  
983 *Nucleic Acids Research.* 2019 Jul 2;47(W1):W191–8.
- 984 44. Chagnot A, Barnes SR, Montagne A. Magnetic Resonance Imaging of Blood–Brain Barrier  
985 permeability in Dementia. *Neuroscience.* 2021 Oct 15;474:14–29.
- 986 45. Kalaria RN, Sepulveda-Falla D. Cerebral Small Vessel Disease in Sporadic and Familial  
987 Alzheimer Disease. *The American Journal of Pathology.* 2021 Nov 1;191(11):1888–905.
- 988 46. Zhang C, Qin F, Li X, Du X, Li T. Identification of novel proteins for lacunar stroke by  
989 integrating genome-wide association data and human brain proteomes. *BMC Medicine.*  
990 2022 Jun 23;20(1):211.
- 991 47. Bai B, Vanderwall D, Li Y, Wang X, Poudel S, Wang H, et al. Proteomic landscape of  
992 Alzheimer’s Disease: novel insights into pathogenesis and biomarker discovery. *Mol*  
993 *Neurodegener.* 2021 Aug 12;16:55.
- 994 48. Wingo AP, Liu Y, Gerasimov ES, Gockley J, Logsdon BA, Duong DM, et al. Integrating  
995 human brain proteomes with genome-wide association data implicates new proteins in  
996 Alzheimer’s disease pathogenesis. *Nat Genet.* 2021 Feb;53(2):143–6.
- 997 49. Ou YN, Yang YX, Deng YT, Zhang C, Hu H, Wu BS, et al. Identification of novel drug  
998 targets for Alzheimer’s disease by integrating genetics and proteomes from brain and blood.  
999 *Mol Psychiatry.* 2021 Oct;26(10):6065–73.
- 1000 50. Cullell N, Gallego-Fábrega C, Cárcel-Márquez J, Muiño E, Llucà-Carol L, Lledós M, et al.  
1001 ICA1L Is Associated with Small Vessel Disease: A Proteome-Wide Association Study in  
1002 Small Vessel Stroke and Intracerebral Haemorrhage. *Int J Mol Sci.* 2022 Mar  
1003 15;23(6):3161.
- 1004 51. Liu DZ, Sharp FR. Excitatory and Mitogenic Signaling in Cell Death, Blood–brain Barrier  
1005 Breakdown, and BBB Repair after Intracerebral Hemorrhage. *Transl Stroke Res.* 2012 Jul  
1006 1;3(1):62–9.
- 1007 52. Lai TW, Zhang S, Wang YT. Excitotoxicity and stroke: Identifying novel targets for  
1008 neuroprotection. *Progress in Neurobiology.* 2014 Apr 1;115:157–88.
- 1009 53. Ge YJ, Ou YN, Deng YT, Wu BS, Yang L, Zhang YR, et al. Prioritization of Drug Targets  
1010 for Neurodegenerative Diseases by Integrating Genetic and Proteomic Data From Brain and  
1011 Blood. *Biological Psychiatry.* 2023 May 1;93(9):770–9.

- 1012 54. Kanehisa M, Furumichi M, Sato Y, Ishiguro-Watanabe M, Tanabe M. KEGG: integrating  
1013 viruses and cellular organisms. *Nucleic Acids Research*. 2021 Jan 8;49(D1):D545–51.
- 1014 55. De Bruijn MF, Speck NA. Core-binding factors in hematopoiesis and immune function.  
1015 *Oncogene*. 2004 May 24;23(24):4238–48.
- 1016 56. Maillard I, Adler SH, Pear WS. Notch and the Immune System. *Immunity*. 2003  
1017 Dec;19(6):781–91.
- 1018 57. Radtke F, Wilson A, Mancini SJC, MacDonald HR. Notch regulation of lymphocyte  
1019 development and function. *Nat Immunol*. 2004 Mar;5(3):247–53.
- 1020 58. Rothenberg EV, Taghon T. MOLECULAR GENETICS OF T CELL DEVELOPMENT.  
1021 *Annu Rev Immunol*. 2005 Apr 1;23(1):601–49.
- 1022 59. Shapiro-Shelef M, Calame K. Regulation of plasma-cell development. *Nat Rev Immunol*.  
1023 2005 Mar;5(3):230–42.
- 1024 60. Spits H. Development of  $\alpha\beta$  T cells in the human thymus. *Nat Rev Immunol*. 2002  
1025 Oct;2(10):760–72.
- 1026 61. Lambert JC, Ibrahim-Verbaas CA, Harold D, Naj AC, Sims R, Bellenguez C, et al. Meta-  
1027 analysis of 74,046 individuals identifies 11 new susceptibility loci for Alzheimer’s disease.  
1028 *Nat Genet*. 2013 Dec;45(12):1452–8.
- 1029 62. Hollingworth P, Harold D, Sims R, Gerrish A, Lambert JC, Carrasquillo MM, et al. Common  
1030 variants in ABCA7, MS4A6A/MS4A4E, EPHA1, CD33 and CD2AP are associated with  
1031 Alzheimer’s disease. *Nat Genet*. 2011 May;43(5):429–35.
- 1032 63. Reitz C, Mayeux R. Genetics of Alzheimer’s Disease in Caribbean Hispanic and African  
1033 American Populations. *Biological Psychiatry*. 2014 Apr;75(7):534–41.
- 1034 64. Reitz C, Jun G, Naj A, Rajbhandary R. Variants in the ATP-Binding Cassette Transporter  
1035 (ABCA7), Apolipoprotein E  $\epsilon$ 4, and the Risk of Late-Onset Alzheimer Disease in African  
1036 Americans. *JAMA*. 2013 Apr 10;309(14):1483–92.
- 1037 65. De Roeck A, Van Broeckhoven C, Slegers K. The role of ABCA7 in Alzheimer’s disease:  
1038 evidence from genomics, transcriptomics and methylomics. *Acta Neuropathol*. 2019 Aug  
1039 1;138(2):201–20.
- 1040 66. Guardiola M, Muntané G, Martínez I, Martorell L, Girona J, Ibarretxe D, et al. Metabolic  
1041 Overlap between Alzheimer’s Disease and Metabolic Syndrome Identifies the PVRL2 Gene  
1042 as a New Modulator of Diabetic Dyslipidemia. *Int J Mol Sci*. 2023 Apr 18;24(8):7415.
- 1043 67. Liang X, Liu C, Liu K, Cong L, Wang Y, Liu R, et al. Association and interaction of  
1044 TOMM40 and PVRL2 with plasma amyloid- $\beta$  and Alzheimer’s disease among Chinese  
1045 older adults: a population-based study. *Neurobiol Aging*. 2022 May;113:143–51.

- 1046 68. Chatterjee P, Roy D, Bhattacharyya M, Bandyopadhyay S. Biological networks in  
1047 Parkinson's disease: an insight into the epigenetic mechanisms associated with this disease.  
1048 BMC Genomics. 2017 Sep 12;18(1):721.
- 1049 69. Gialluisi A, Reccia MG, Modugno N, Nutile T, Lombardi A, Di Giovannantonio LG, et al.  
1050 Identification of sixteen novel candidate genes for late onset Parkinson's disease. Mol  
1051 Neurodegener. 2021 Jun 21;16(1):35.
- 1052 70. Salem M, Ammitzboell M, Nys K, Seidelin JB, Nielsen OH. ATG16L1: A multifunctional  
1053 susceptibility factor in Crohn disease. Autophagy. 2015 Apr 23;11(4):585–94.
- 1054 71. Hansson O, Kumar A, Janelidze S, Stomrud E, Insel PS, Blennow K, et al. The genetic  
1055 regulation of protein expression in cerebrospinal fluid. EMBO Mol Med. 2023 Jan  
1056 11;15(1):e16359.
- 1057 72. Cali E, Dominik N, Manole A, Houlden H. Riboflavin Transporter Deficiency. In: Adam  
1058 MP, Mirzaa GM, Pagon RA, Wallace SE, Bean LJ, Gripp KW, et al., editors.  
1059 GeneReviews® [Internet]. Seattle (WA): University of Washington, Seattle; 1993 [cited  
1060 2023 Jul 31]. Available from: <http://www.ncbi.nlm.nih.gov/books/NBK299312/>
- 1061 73. Novikova G, Kapoor M, Tcw J, Abud EM, Efthymiou AG, Chen SX, et al. Integration of  
1062 Alzheimer's disease genetics and myeloid genomics identifies disease risk regulatory  
1063 elements and genes. Nat Commun. 2021 Mar 12;12(1):1610.
- 1064 74. Allan CM, Walker D, Segrest JP, Taylor JM. Identification and characterization of a new  
1065 human gene (APOC4) in the apolipoprotein E, C-I, and C-II gene locus. Genomics. 1995  
1066 Jul 20;28(2):291–300.
- 1067 75. Wang P, Luo M, Zhou W, Jin X, Xu Z, Yan S, et al. Global Characterization of Peripheral B  
1068 Cells in Parkinson's Disease by Single-Cell RNA and BCR Sequencing. Front Immunol.  
1069 2022;13:814239.
- 1070 76. Lp Y, Mj S. The cryptic HLA-DQA2 ("DX alpha") gene is expressed in human B cell lines.  
1071 Journal of immunology (Baltimore, Md. : 1950) [Internet]. 1991 Dec 15 [cited 2023 Aug  
1072 4];147(12). Available from: <https://pubmed.ncbi.nlm.nih.gov/1753107/>
- 1073 77. Li GJ, Yang QH, Yang GK, Yang G, Hou Y, Hou LJ, et al. MiR-125b and SATB1-AS1  
1074 might be shear stress-mediated therapeutic targets. Gene. 2023 Mar 20;857:147181.
- 1075 78. Naguib A, Sandmann T, Yi F, Watts RJ, Lewcock JW, Dowdle WE. SUPT4H1 Depletion  
1076 Leads to a Global Reduction in RNA. Cell Rep. 2019 Jan 2;26(1):45-53.e4.
- 1077 79. Greaves CV, Rohrer JD. An update on genetic frontotemporal dementia. J Neurol. 2019  
1078 Aug;266(8):2075–86.
- 1079 80. Ballasch I, García-García E, Vila C, Pérez-González A, Sancho-Balsells A, Fernández J, et  
1080 al. Ikzf1 as a novel regulator of microglial homeostasis in inflammation and  
1081 neurodegeneration. Brain Behav Immun. 2023 Mar;109:144–61.



- 1082 81. Schutte B, Henfling M, Ramaekers FCS. DEDD association with cytokeratin filaments  
1083 correlates with sensitivity to apoptosis. *Apoptosis*. 2006 Sep;11(9):1561–72.
- 1084 82. Dahal A, Hinton SD. Antagonistic roles for STYX pseudophosphatases in neurite outgrowth.  
1085 *Biochem Soc Trans*. 2017 Apr 15;45(2):381–7.
- 1086 83. Burgaletto C, Munafò A, Di Benedetto G, De Francisci C, Caraci F, Di Mauro R, et al. The  
1087 immune system on the TRAIL of Alzheimer’s disease. *Journal of Neuroinflammation*. 2020  
1088 Oct 13;17(1):298.
- 1089 84. Traylor M, Persyn E, Tomppo L, Klasson S, Abedi V, Bakker MK, et al. Genetic basis of  
1090 lacunar stroke: a pooled analysis of individual patient data and genome-wide association  
1091 studies. *Lancet Neurol*. 2021 May;20(5):351–61.
- 1092 85. Chen K, Zhu L, Guo L, Pan YB, Feng DF. Maf1 regulates dendritic morphogenesis and  
1093 influences learning and memory. *Cell Death Dis*. 2020 Jul 30;11(7):606.
- 1094 86. Kumar AA, Yeo N, Whittaker M, Attra P, Barrick TR, Bridges LR, et al. Vascular Collagen  
1095 Type-IV in Hypertension and Cerebral Small Vessel Disease. *Stroke*. 2022  
1096 Dec;53(12):3696–705.
- 1097 87. Miners S, van Helmond Z, Barker R, Passmore PA, Johnston JA, Todd S, et al. Genetic  
1098 variation in MME in relation to neprilysin protein and enzyme activity, A $\beta$  levels, and  
1099 Alzheimer’s disease risk. *Int J Mol Epidemiol Genet*. 2012;3(1):30–8.
- 1100 88. Chen G, Li L, Tao H. Bioinformatics Identification of Ferroptosis-Related Biomarkers and  
1101 Therapeutic Compounds in Ischemic Stroke. *Front Neurol*. 2021;12:745240.
- 1102 89. Pan Y, Fu Y, Baird PN, Guymer RH, Das T, Iwata T. Exploring the contribution of ARMS2  
1103 and HTRA1 genetic risk factors in age-related macular degeneration. *Prog Retin Eye Res*.  
1104 2022 Dec 27;101159.
- 1105 90. Thee EF, Colijn JM, Cougnard-Grégoire A, Meester-Smoor MA, Verzijden T, Hoyng CB, et  
1106 al. The Phenotypic Course of Age-Related Macular Degeneration for ARMS2/HTRA1: The  
1107 EYE-RISK Consortium. *Ophthalmology*. 2022 Jul;129(7):752–64.
- 1108 91. Gatta LB, Vitali M, Zanola A, Venturelli E, Fenoglio C, Galimberti D, et al. Polymorphisms  
1109 in the LOC387715/ARMS2 putative gene and the risk for Alzheimer’s disease. *Dement  
1110 Geriatr Cogn Disord*. 2008;26(2):169–74.
- 1111 92. Wang P, Qin W, Wang P, Huang Y, Liu Y, Zhang R, et al. Genomic Variants in NEURL,  
1112 GJA1 and CUX2 Significantly Increase Genetic Susceptibility to Atrial Fibrillation. *Sci  
1113 Rep*. 2018 Feb 19;8(1):3297.
- 1114 93. Li RG, Xu YJ, Ye WG, Li YJ, Chen H, Qiu XB, et al. Connexin45 (GJC1) loss-of-function  
1115 mutation contributes to familial atrial fibrillation and conduction disease. *Heart Rhythm*.  
1116 2021 May;18(5):684–93.

- 1117 94. Zhu C, Xiao F, Lin W. EFTUD2 on innate immunity. *Oncotarget*. 2015 Oct 20;6(32):32313–  
1118 4.
- 1119 95. Abo Elwafa R, Gamaleldin M, Ghallab O. The clinical and prognostic significance of FIS1,  
1120 SPI1, PDCD7 and Ang2 expression levels in acute myeloid leukemia. *Cancer Genet*. 2019  
1121 Apr;233–234:84–95.
- 1122 96. Vadhvani M, Schwedhelm-Domeyer N, Mukherjee C, Stegmüller J. The centrosomal E3  
1123 ubiquitin ligase FBXO31-SCF regulates neuronal morphogenesis and migration. *PLoS One*.  
1124 2013;8(2):e57530.
- 1125 97. Serpeloni F, Nätt D, Assis SG de, Wieling E, Elbert T. Experiencing community and  
1126 domestic violence is associated with epigenetic changes in DNA methylation of BDNF and  
1127 CLPX in adolescents. *Psychophysiology*. 2020;57(1):e13382.
- 1128 98. ZSCAN29 zinc finger and SCAN domain containing 29 [Homo sapiens (human)] - Gene -  
1129 NCBI [Internet]. [cited 2023 Aug 1]. Available from:  
1130 <https://www.ncbi.nlm.nih.gov/gene/146050#summary>
- 1131 99. Baker TA, Sauer RT. ClpXP, an ATP-powered unfolding and protein-degradation machine.  
1132 *Biochimica et Biophysica Acta (BBA) - Molecular Cell Research*. 2012 Jan 1;1823(1):15–  
1133 28.
- 1134 100. Thomas T, Perdue MV, Khalaf S, Landi N, Hoeft F, Pugh K, et al. Neuroimaging genetic  
1135 associations between SEMA6D, brain structure, and reading skills. *J Clin Exp*  
1136 *Neuropsychol*. 2021 Apr;43(3):276–89.
- 1137 101. Perdue MV, Mascheretti S, Kornilov SA, Jasińska KK, Ryherd K, Einar Mencl W, et al.  
1138 Common variation within the SETBP1 gene is associated with reading-related skills and  
1139 patterns of functional neural activation. *Neuropsychologia*. 2019 Jul;130:44–51.
- 1140 102. Ziegler GC, Ehli AC, Weber H, Vitale MR, Zöllner JEM, Ku HP, et al. A Common CDH13  
1141 Variant Is Associated with Low Agreeableness and Neural Responses to Working Memory  
1142 Tasks in ADHD. *Genes*. 2021 Sep;12(9):1356.
- 1143 103. Trubetskoy V, Pardiñas AF, Qi T, Panagiotaropoulou G, Awasthi S, Bigdeli TB, et al.  
1144 Mapping genomic loci implicates genes and synaptic biology in schizophrenia. *Nature*.  
1145 2022 Apr;604(7906):502–8.
- 1146 104. Beerli MS, Lin HM, Sano M, Ravona-Springer R, Liu X, Bendlin BB, et al. Association of  
1147 the Haptoglobin Gene Polymorphism With Cognitive Function and Decline in Elderly  
1148 African American Adults With Type 2 Diabetes: Findings From the Action to Control  
1149 Cardiovascular Risk in Diabetes-Memory in Diabetes (ACCORD-MIND) Study. *JAMA*  
1150 *Netw Open*. 2018 Nov 2;1(7):e184458.
- 1151 105. Kikuchi M, Yamada K, Toyota T, Yoshikawa T. C18orf1 located on chromosome 18p11.2  
1152 may confer susceptibility to schizophrenia. *J Med Dent Sci*. 2003 Sep;50(3):225–9.

- 1153 106. Zhang Z, Shang J, Dai Z, Yao Y, Shi Y, Zhong D, et al. Transmembrane Protein 170B is a  
1154 Prognostic Biomarker and Associated With Immune Infiltrates in Pancreatic  
1155 Adenocarcinoma. *Front Genet.* 2022;13:848391.
- 1156 107. Ge Y, Grossman RI, Babb JS, Rabin ML, Mannon LJ, Kolson DL. Age-Related Total Gray  
1157 Matter and White Matter Changes in Normal Adult Brain. Part I: Volumetric MR Imaging  
1158 Analysis. *American Journal of Neuroradiology.* 2002 Sep 1;23(8):1327–33.
- 1159 108. Davies G, Armstrong N, Bis JC, Bressler J, Chouraki V, Giddaluru S, et al. Genetic  
1160 contributions to variation in general cognitive function: a meta-analysis of genome-wide  
1161 association studies in the CHARGE consortium (N=53 949). *Mol Psychiatry.* 2015  
1162 Feb;20(2):183–92.
- 1163 109. Dumitrescu L, Mahoney ER, Mukherjee S, Lee ML, Bush WS, Engelman CD, et al.  
1164 Genetic variants and functional pathways associated with resilience to Alzheimer’s disease.  
1165 *Brain.* 2020 Aug 25;143(8):2561–75.
- 1166 110. Fridman AL, Tainsky MA. Critical pathways in cellular senescence and immortalization  
1167 revealed by gene expression profiling. *Oncogene.* 2008 Oct;27(46):5975–87.
- 1168 111. Wainberg M, Sinnott-Armstrong N, Mancuso N, Barbeira AN, Knowles DA, Golan D, et  
1169 al. Opportunities and challenges for transcriptome-wide association studies. *Nat Genet.*  
1170 2019 Apr;51(4):592–9.
- 1171 112. Wu C, Pan W. A powerful fine-mapping method for transcriptome-wide association  
1172 studies. *Hum Genet.* 2020 Feb;139(2):199–213.

1173

1174
